# Supplementary material for: Differentially profiling the low-expression transcriptomes of human hepatoma using a novel SSH/microarray approach
Source: PubMed Central journal article supplement (PMC1522022; doi:10.1186/1471-2164-7-131), 2006-05-31
Supplement: 1471-2164-7-131-S1.pdf [file 1471-2164-7-131-S1.pdf]

**TableS 1a :43 De-regulate at SSH and cDNA base on average fold change > 2 or < 0.5 and p value < 0.01 (t t**

| Gene Name                                               | Symbol    | UniGene ID | Cytoband       | P value in |        |
|---------------------------------------------------------|-----------|------------|----------------|------------|--------|
|                                                         |           |            |                | SSH        | cDNA   |
| complement component 9                                  | C9        | Hs.1290    | 5p14-p12       | 0.0006     | 0.0010 |
| tryptophan 2,3-dioxygenase                              | TDO2      | Hs.183671  | 4q31-q32       | 0.0000     | 0.0029 |
| REV3-like, catalytic subunit of DNA polymerase zeta     | REV3L     | Hs.232021  | 6q21           | 0.0020     | 0.0087 |
| interleukin 1 receptor-like 1                           | IL1RL1    | Hs.66      | 2q12           | 0.0025     | 0.0039 |
| UDP-glucose pyrophosphorylase 2                         | UGP2      | Hs.417361  | 2p14-p13       | 0.0001     | 0.0003 |
| protein phosphatase 1, regulatory (inhibitor) subunit 3 | PPP1R3C   | Hs.303090  | 10q23-q24      | 0.0000     | 0.0003 |
| metallothionein 1F (functional)                         | MT1F      | Hs.438737  | 16q13          | 0.0002     | 0.0072 |
| tubulin, alpha, ubiquitous                              | K-ALPHA-1 | Hs.446608  | 12q13.12       | 0.0059     | 0.0000 |
| hypothetical protein FLJ33641                           | FLJ33641  | Hs.44930   | 5q11.2         | 0.0055     | 0.0018 |
| CDNA FLJ12815 fis, clone NT2RP2002546                   | EST       | Hs.27621   |                | 0.0029     | 0.0002 |
| Similar to 40S ribosomal protein SA (P40) (34/67 kDa    | EST       | Hs.448968  | 19p12          | 0.0001     | 0.0015 |
| fetal Alzheimer antigen                                 | FALZ      | Hs.440947  | 17q24.3        | 0.0074     | 0.0018 |
| alpha-2-HS-glycoprotein                                 | AHSG      | Hs.324746  | 3q27           | 0.0047     | 0.0068 |
| UDP glycosyltransferase 1 family, polypeptide A10       | UGT1A10   | Hs.278896  |                | 0.0004     | 0.0003 |
| 4-hydroxyphenylpyruvate dioxygenase                     | HPD       | Hs.2899    | 12q24-qter     | 0.0029     | 0.0001 |
| catenin (cadherin-associated protein), alpha-like 1     | CTNNAL1   | Hs.58488   | 9q31.2         | 0.0044     | 0.0058 |
| COX15 homolog, cytochrome c oxidase assembly prot       | COX15     | Hs.226581  | 10q24          | 0.0001     | 0.0020 |
| thiopurine S-methyltransferase                          | TPMT      | Hs.377402  | 6p22.3         | 0.0021     | 0.0001 |
| lipoyltransferase 1                                     | LIPT1     | Hs.112356  | 2q11.2         | 0.0010     | 0.0000 |
| fatty acid binding protein 3, muscle and heart (mamma   | FABP3     | Hs.112669  | 1p33-p32       | 0.0019     | 0.0020 |
| tryptophan 2,3-dioxygenase                              | TDO2      | Hs.183671  | 4q31-q32       | 0.0003     | 0.0007 |
| villin 2 (ezrin)                                        | VIL2      | Hs.403997  | 6q25.2-q26     | 0.0024     | 0.0000 |
| tubulin, alpha, ubiquitous                              | K-ALPHA-1 | Hs.446608  | 12q13.12       | 0.0039     | 0.0041 |
| 4-hydroxyphenylpyruvate dioxygenase                     | HPD       | Hs.2899    | 12q24-qter     | 0.0000     | 0.0055 |
| complement component 9                                  | C9        | Hs.1290    | 5p14-p12       | 0.0003     | 0.0000 |
| metallothionein 1F (functional)                         | MT1F      | Hs.438737  | 16q13          | 0.0000     | 0.0001 |
| hypothetical protein FLJ23235                           | FLJ23235  | Hs.211501  | 4p14           | 0.0000     | 0.0075 |
| zinc finger protein 519                                 | ZNF519    | Hs.352635  | 18p11.21       | 0.0000     | 0.0007 |
| solute carrier family 38, member 2                      | SLC38A2   | Hs.298275  | 12q            | 0.0010     | 0.0031 |
| metallothionein 1A (functional)                         | MT1A      | Hs.440939  | 16q13          | 0.0000     | 0.0001 |
| hypothetical protein LOC51244                           | LOC51244  | Hs.236257  | 3p25.1         | 0.0060     | 0.0009 |
| chemokine (C-X-C motif) ligand 2                        | CXCL2     | Hs.75765   | 4q21           | 0.0062     | 0.0009 |
| golgi reassembly stacking protein 2, 55kDa              | GORASP2   | Hs.6880    | 2q31.1-q31.2   | 0.0096     | 0.0049 |
| Transcribed sequence with moderate similarity to prote  | EST       | Hs.447471  |                | 0.0062     | 0.0061 |
| metallothionein 2A                                      | MT2A      | Hs.418241  | 16q13          | 0.0000     | 0.0015 |
| chromosome 20 open reading frame 64                     | C20orf64  | Hs.440263  | 20q13.2        | 0.0003     | 0.0035 |
| hypothetical protein FLJ20445                           | FLJ20445  | Hs.343748  | 10q23.32-q23.3 | 0.0070     | 0.0088 |
| insulin-like growth factor binding protein 1            | IGFBP1    | Hs.401316  | 7p13-p12       | 0.0002     | 0.0070 |
| metallothionein 1X                                      | MT1X      | Hs.374950  | 16q13          | 0.0001     | 0.0008 |
| metallothionein 1K                                      | MT1K      | Hs.188518  | 16q13          | 0.0000     | 0.0079 |
| PR domain containing 10                                 | PRDM10    | Hs.275086  | 11q25          | 0.0046     | 0.0003 |
| tubulin, alpha, ubiquitous                              | K-ALPHA-1 | Hs.446608  | 12q13.12       | 0.0033     | 0.0000 |
| stathmin 1/oncoprotein 18                               | STMN1     | Hs.209983  | 1p36.1-p35     | 0.0090     | 0.0034 |

**TableS 1b : 69 De-regulate at cDNA base on average fold change > 2 or < 0.5 and p value < 0.01 (T test)**

| Gene Name                                                                      | Symbol    | UniGene ID | Cytoband      | P value in |        |
|--------------------------------------------------------------------------------|-----------|------------|---------------|------------|--------|
|                                                                                |           |            |               | SSH        | cDNA   |
| translational inhibitor protein p14.5                                          | UK114     | Hs.18426   | 8q22          | 0.0133     | 0.0081 |
| complement component 9                                                         | C9        | Hs.1290    | 5p14-p12      | 0.0006     | 0.0010 |
| histone 1, H4j                                                                 | HIST1H4J  | Hs.278483  | 6p22-p21.3    | 0.0272     | 0.0037 |
| paternally expressed 3                                                         | PEG3      | Hs.201776  |               | 0.0113     | 0.0026 |
| hemopexin                                                                      | HPX       | Hs.426485  | 11p15.5-p15.4 | 0.0117     | 0.0009 |
| tryptophan 2,3-dioxygenase                                                     | TDO2      | Hs.183671  | 4q31-q32      | 0.0000     | 0.0029 |
| REV3-like, catalytic subunit of DNA polymerase zeta                            | REV3L     | Hs.232021  | 6q21          | 0.0020     | 0.0087 |
| interleukin 1 receptor-like 1                                                  | IL1RL1    | Hs.66      | 2q12          | 0.0025     | 0.0039 |
| UDP-glucose pyrophosphorylase 2                                                | UGP2      | Hs.417361  | 2p14-p13      | 0.0001     | 0.0003 |
| protein phosphatase 1, regulatory (inhibitor) subunit 3                        | PPP1R3C   | Hs.303090  | 10q23-q24     | 0.0000     | 0.0003 |
| metallothionein 1F (functional)                                                | MT1F      | Hs.438737  | 16q13         | 0.0002     | 0.0072 |
| deformed epidermal autoregulatory factor 1 (Drosophila)                        | DEAF1     | Hs.428112  | 11p15.5       | 0.0108     | 0.0005 |
| tubulin, alpha, ubiquitous                                                     | K-ALPHA-1 | Hs.446608  | 12q13.12      | 0.0059     | 0.0000 |
| hypothetical protein FLJ33641                                                  | FLJ33641  | Hs.44930   | 5q11.2        | 0.0055     | 0.0018 |
| solute carrier family 39 (zinc transporter), member 14                         | SLC39A14  | Hs.301743  | 8p21.3        | 0.0173     | 0.0016 |
| CDNA FLJ12815 fis, clone NT2RP2002546                                          | EST       | Hs.27621   |               | 0.0029     | 0.0002 |
| Transcribed sequences                                                          | EST       | Hs.459670  |               | 0.0414     | 0.0049 |
| MRNA; cDNA DKFZp31311032 (from clone DKFZp31311032)                            | EST       | Hs.321261  |               | 0.8839     | 0.0049 |
| dermatan sulfate proteoglycan 3                                                | DSPG3     | Hs.435680  | 12q21         | 0.0765     | 0.0026 |
| Similar to 40S ribosomal protein SA (P40) (34/67 kDa)                          | EST       | Hs.448968  | 19p12         | 0.0001     | 0.0015 |
| fetal Alzheimer antigen                                                        | FALZ      | Hs.440947  | 17q24.3       | 0.0074     | 0.0018 |
| alpha-2-HS-glycoprotein                                                        | AHSG      | Hs.324746  | 3q27          | 0.0047     | 0.0068 |
| pleiomorphic adenoma gene-like 1                                               | PLAGL1    | Hs.132911  |               | 0.1459     | 0.0003 |
| serine (or cysteine) proteinase inhibitor, clade A (alpha-1)                   | SERPINA3  | Hs.76353   | 14q32.1       | 0.0323     | 0.0013 |
| jumonji domain containing 2A                                                   | JMJD2A    | Hs.155983  | 1p34.2-p34.1  | 0.0291     | 0.0036 |
| UDP glycosyltransferase 1 family, polypeptide A10                              | UGT1A10   | Hs.278896  |               | 0.0004     | 0.0003 |
| 4-hydroxyphenylpyruvate dioxygenase                                            | HPD       | Hs.2899    | 12q24-qter    | 0.0029     | 0.0001 |
| catenin (cadherin-associated protein), alpha-like 1                            | CTNNAL1   | Hs.58488   | 9q31.2        | 0.0044     | 0.0058 |
| COX15 homolog, cytochrome c oxidase assembly protein                           | COX15     | Hs.226581  | 10q24         | 0.0001     | 0.0020 |
| polymerase (RNA) II (DNA directed) polypeptide I, 140kDa                       | POLR2I    | Hs.47062   | 19q12         | 0.0171     | 0.0022 |
| mannosyl (alpha-1,6-)-glycoprotein beta-1,2-N-acetylglucosaminyltransferase II | MGAT2     | Hs.93338   | 14q21         | 0.2976     | 0.0043 |
| thiopurine S-methyltransferase                                                 | TPMT      | Hs.377402  | 6p22.3        | 0.0021     | 0.0001 |
| lipoyltransferase 1                                                            | LIPT1     | Hs.112356  | 2q11.2        | 0.0010     | 0.0000 |
| fatty acid binding protein 3, muscle and heart (mammary)                       | FABP3     | Hs.112669  | 1p33-p32      | 0.0019     | 0.0020 |
| tryptophan 2,3-dioxygenase                                                     | TDO2      | Hs.183671  | 4q31-q32      | 0.0003     | 0.0007 |
| villin 2 (ezrin)                                                               | VIL2      | Hs.403997  | 6q25.2-q26    | 0.0024     | 0.0000 |
| tubulin, alpha, ubiquitous                                                     | K-ALPHA-1 | Hs.446608  | 12q13.12      | 0.0039     | 0.0041 |
| tubulin, alpha, ubiquitous                                                     | K-ALPHA-1 | Hs.446608  | 12q13.12      | 0.0184     | 0.0050 |
| CD48 antigen (B-cell membrane protein)                                         | CD48      | Hs.901     | 1q21.3-q22    | 0.0302     | 0.0089 |
| 4-hydroxyphenylpyruvate dioxygenase                                            | HPD       | Hs.2899    | 12q24-qter    | 0.0000     | 0.0055 |
| complement component 9                                                         | C9        | Hs.1290    | 5p14-p12      | 0.0003     | 0.0000 |
| metallothionein 1F (functional)                                                | MT1F      | Hs.438737  | 16q13         | 0.0000     | 0.0001 |
| hypothetical protein FLJ23235                                                  | FLJ23235  | Hs.211501  | 4p14          | 0.0000     | 0.0075 |
| zinc finger protein 519                                                        | ZNF519    | Hs.352635  | 18p11.21      | 0.0000     | 0.0007 |
| solute carrier family 38, member 2                                             | SLC38A2   | Hs.298275  | 12q           | 0.0010     | 0.0031 |
| metallothionein 1A (functional)                                                | MT1A      | Hs.440939  | 16q13         | 0.0000     | 0.0001 |
| hypothetical protein LOC51244                                                  | LOC51244  | Hs.236257  | 3p25.1        | 0.0060     | 0.0009 |
| chemokine (C-X-C motif) ligand 2                                               | CXCL2     | Hs.75765   | 4q21          | 0.0062     | 0.0009 |
| golgi reassembly stacking protein 2, 55kDa                                     | GORASP2   | Hs.6880    | 2q31.1-q31.2  | 0.0096     | 0.0049 |
| Transcribed sequence with moderate similarity to protein                       | EST       | Hs.447471  |               | 0.0062     | 0.0061 |
| hemoglobin, alpha 2                                                            | HBA2      | Hs.449630  | 16p13.3       | 0.1836     | 0.0023 |
| CDNA clone MGC:52263 IMAGE:4123447, complete                                   | EST       | Hs.251664  |               | 0.0268     | 0.0011 |
| Transcribed sequence with moderate similarity to protein                       | EST       | Hs.447471  |               | 0.0184     | 0.0000 |
| Clone IMAGE:4824631, mRNA                                                      | EST       | Hs.385640  |               | 0.0065     | 0.0057 |
| Clone IMAGE:5272798, mRNA                                                      | EST       | Hs.131463  |               | 0.0817     | 0.0011 |
| Similar to Nonhistone chromosomal protein HMG-14                               | EST       | Hs.469373  | 18q21.31      | 0.0396     | 0.0002 |
| metallothionein 2A                                                             | MT2A      | Hs.418241  | 16q13         | 0.0000     | 0.0015 |
| chromosome 20 open reading frame 64                                            | C20orf64  | Hs.440263  | 20q13.2       | 0.0003     | 0.0035 |

|                                              |           |           |                |        |        |
|----------------------------------------------|-----------|-----------|----------------|--------|--------|
| hypothetical protein FLJ20445                | FLJ20445  | Hs.343748 | 10q23.32-q23.3 | 0.0070 | 0.0088 |
| hypothetical protein BC011204                | LOC113828 | Hs.197680 | 22q13.1        | 0.0124 | 0.0082 |
| mitogen-activated protein kinase 6           | MAPK6     | Hs.271980 | 15q21          | 0.0146 | 0.0050 |
| insulin-like growth factor binding protein 1 | IGFBP1    | Hs.401316 | 7p13-p12       | 0.0002 | 0.0070 |
| KIAA1173 protein                             | KIAA1173  | Hs.27566  | 3p22.1         | 0.2857 | 0.0025 |
| metallothionein 1X                           | MT1X      | Hs.374950 | 16q13          | 0.0001 | 0.0008 |
| metallothionein 1K                           | MT1K      | Hs.188518 | 16q13          | 0.0000 | 0.0079 |
| PR domain containing 10                      | PRDM10    | Hs.275086 | 11q25          | 0.0046 | 0.0003 |
| Similar to tubulin, beta 5 (LOC92755), mRNA  | EST       | Hs.458472 | 8p12           | 0.0330 | 0.0075 |
| tubulin, alpha, ubiquitous                   | K-ALPHA-1 | Hs.446608 | 12q13.12       | 0.0033 | 0.0000 |
| stathmin 1/oncoprotein 18                    | STMN1     | Hs.209983 | 1p36.1-p35     | 0.0090 | 0.0034 |

---

**TableS 1c : 701 De-regulate at SSH base on average fold change > 2 or < 0.5 and p value < 0.01 (t test)**

| Gene Name                                                                     | Symbol    | UniGene ID | Cytoband       | P value in |        |
|-------------------------------------------------------------------------------|-----------|------------|----------------|------------|--------|
|                                                                               |           |            |                | SSH        | cDNA   |
| Transcribed sequence with strong similarity to protein complement component 9 | EST       | Hs.485572  |                | 0.0002     | 0.0249 |
| arginase, liver                                                               | C9        | Hs.1290    | 5p14-p12       | 0.0006     | 0.0010 |
| high mobility group nucleosomal binding domain 4                              | ARG1      | Hs.440934  | 6q23           | 0.0013     | 0.0140 |
| general transcription factor IIA, 2, 12kDa                                    | HMGN4     | Hs.236774  | 6p21.3         | 0.0000     | 0.2672 |
| haptoglobin                                                                   | GTF2A2    | Hs.279528  | 15q22.2        | 0.0019     | 0.2512 |
| chromosome 18 open reading frame 1                                            | HP        | Hs.403931  | 16q22.1        | 0.0050     | 0.1036 |
| ribosomal protein L37a                                                        | C18orf1   | Hs.285091  | 18p11.2        | 0.0055     | 0.0718 |
| tubulin alpha 6                                                               | RPL37A    | Hs.433701  | 2q35           | 0.0055     | 0.0584 |
| hydroxysteroid (17-beta) dehydrogenase 4                                      | TUBA6     | Hs.406578  | 12q12-q14      | 0.0021     | 0.0574 |
| chymotrypsin C (caldecrin)                                                    | HSD17B4   | Hs.356894  | 5q21           | 0.0000     | 0.9241 |
| tumor necrosis factor receptor superfamily, member 11                         | CTRC      | Hs.8709    | 1p36.21        | 0.0061     | 1.0000 |
| pancreatic lipase-related protein 1                                           | TNFRSF11B | Hs.81791   | 8q24           | 0.0050     | 0.0249 |
| v-ets erythroblastosis virus E26 oncogene homolog 2 (ETS2)                    | PNLIPRP1  | Hs.73923   | 10q25.3        | 0.0030     | 0.8543 |
| RAB11A, member RAS oncogene family                                            | ETS2      | Hs.292477  | 21q22.3        | 0.0000     | 0.0404 |
| allograft inflammatory factor 1                                               | RAB11A    | Hs.75618   | 15q21.3-q22.31 | 0.0084     | 0.3632 |
| cathepsin S                                                                   | AIF1      | Hs.76364   | 6p21.3         | 0.0083     | 0.1384 |
| tryptophan 2,3-dioxygenase                                                    | CTSS      | Hs.181301  | 1q21           | 0.0083     | 0.1859 |
| hemoglobin, beta                                                              | TDO2      | Hs.183671  | 4q31-q32       | 0.0000     | 0.0029 |
| gamma-glutamyl hydrolase (conjugase, foylpolypolygamm                         | HBB       | Hs.155376  | 11p15.5        | 0.0092     | 0.0360 |
| malate dehydrogenase 1, NAD (soluble)                                         | GGH       | Hs.78619   | 8q12.3         | 0.0033     | 0.1567 |
| REV3-like, catalytic subunit of DNA polymerase zeta                           | HP        | Hs.403931  | 16q22.1        | 0.0017     | 0.0141 |
| CD69 antigen (p60, early T-cell activation antigen)                           | MDH1      | Hs.75375   | 2p13.3         | 0.0001     | 0.1841 |
| interleukin 1 receptor-like 1                                                 | REV3L     | Hs.232021  | 6q21           | 0.0020     | 0.0087 |
| fibrinogen-like 1                                                             | CD69      | Hs.82401   | 12p13-p12      | 0.0032     | 0.1757 |
| LanC lantibiotic synthetase component C-like 1 (bacte                         | IL1RL1    | Hs.66      | 2q12           | 0.0025     | 0.0039 |
| MRNA, chromosome 1 specific transcript KIAA0507.                              | FGL1      | Hs.107     | 8p22-p21.3     | 0.0015     | 0.0158 |
| solute carrier family 33 (acetyl-CoA transporter), mem                        | LANCL1    | Hs.13351   | 2q33-q35       | 0.0019     | 0.1221 |
| titin                                                                         | EST       | Hs.497770  |                | 0.0092     | 0.3632 |
| 2,4-dienoyl CoA reductase 1, mitochondrial                                    | SLC33A1   | Hs.285176  | 3q25.31        | 0.0021     | 0.0145 |
| chromosome 14 open reading frame 45                                           | TTN       | Hs.434384  |                | 0.0017     | 0.0308 |
| hypothetical protein MGC10854                                                 | DECR1     | Hs.414754  | 8q21.3         | 0.0004     | 0.0495 |
| major histocompatibility complex, class II, DR beta 3                         | C14orf45  | Hs.260555  | 14q24.3        | 0.0063     | 0.2029 |
| translin-associated factor X                                                  | MGC10854  | Hs.410924  | 12q24.11       | 0.0000     | 0.0240 |
| UDP-glucose pyrophosphorylase 2                                               | HLA-DRB3  | Hs.308026  |                | 0.0039     | 0.0645 |
| heat shock transcription factor 2                                             | TSNAX     | Hs.96247   | 1q42.1         | 0.0042     | 0.0593 |
| hepsin (transmembrane protease, serine 1)                                     | UGP2      | Hs.417361  | 2p14-p13       | 0.0001     | 0.0003 |
| Transcribed sequences                                                         | HSF2      | Hs.158195  | 6q22.31        | 0.0060     | 0.1691 |
| solute carrier family 26, member 3                                            | HPN       | Hs.432750  | 19q11-q13.2    | 0.0006     | 0.6065 |
| upstream binding transcription factor, RNA polymeras                          | EST       | Hs.37138   |                | 0.0027     | 0.0489 |
| sialyltransferase 7 ((alpha-N-acetylneuraminy-2,3-beta                        | SLC26A3   | Hs.1650    | 7q31           | 0.0028     | 0.4946 |
| protein phosphatase 1, regulatory (inhibitor) subunit 3                       | UBTF      | Hs.89781   | 17q21.3        | 0.0063     | 0.3972 |
| metallothionein 1F (functional)                                               | SIAT7B    | Hs.288215  | 17q25.1        | 0.0006     | 0.0411 |
| guanine nucleotide binding protein (G protein), alpha i                       | PPP1R3C   | Hs.303090  | 10q23-q24      | 0.0000     | 0.0003 |
| carbonic anhydrase III, muscle specific                                       | MT1F      | Hs.438737  | 16q13          | 0.0002     | 0.0072 |
| B-cell receptor-associated protein 31                                         | GNAI1     | Hs.203862  | 7q21           | 0.0004     | 0.8412 |
| spermidine/spermine N1-acetyltransferase                                      | CA3       | Hs.82129   | 8q13-q22       | 0.0006     | 0.3632 |
| capping protein (actin filament) muscle Z-line, alpha 2                       | BCAP31    | Hs.381232  | Xq28           | 0.0062     | 0.1813 |
| enolase 3, (beta, muscle)                                                     | SAT       | Hs.28491   | Xp22.1         | 0.0004     | 0.0774 |
| ribonuclease, RNase A family, 4                                               | CAPZA2    | Hs.369579  | 7q31.2-q31.3   | 0.0083     | 0.8124 |
| Data not found                                                                | ENO3      | Hs.224171  | 17pter-p11     | 0.0001     | 0.2470 |
| actin related protein 2/3 complex, subunit 3, 21kDa                           | RNASE4    | Hs.283749  |                | 0.0060     | 0.1237 |
| protein phosphatase 1G (formerly 2C), magnesium-dep                           | EST       | Hs.446682  |                | 0.0028     | 0.1075 |
| methionine-tRNA synthetase                                                    | ARPC3     | Hs.439511  | 12q24.11       | 0.0007     | 0.3499 |
| enhancer of zeste homolog 2 (Drosophila)                                      | PPM1G     | Hs.17883   | 2p23.3         | 0.0075     | 0.2618 |
| stratifin                                                                     | MARS      | Hs.355867  | 12q13.2        | 0.0011     | 0.1070 |
| forkhead box M1                                                               | EZH2      | Hs.444082  | 7q35-q36       | 0.0068     | 0.1898 |
|                                                                               | SFN       | Hs.184510  | 1p36.11        | 0.0065     | 0.0221 |
|                                                                               | FOXM1     | Hs.479302  | 12p13          | 0.0085     | 0.3632 |

|                                                         |           |           |              |        |        |
|---------------------------------------------------------|-----------|-----------|--------------|--------|--------|
| retinoblastoma binding protein 7                        | RBBP7     | Hs.406078 | Xp22.2       | 0.0009 | 0.0313 |
| hypothetical protein MGC5178                            | MGC5178   | Hs.458369 | 16p11.2      | 0.0001 | 0.0560 |
| sortilin 1                                              | SORT1     | Hs.394609 | 1p21.3-p13.1 | 0.0047 | 0.2104 |
| zinc finger protein 211                                 | ZNF211    | Hs.449970 | 19q13.4      | 0.0038 | 0.1334 |
| ribosomal protein L18a                                  | RPL18A    | Hs.337766 | 19p13        | 0.0072 | 0.0137 |
| polymerase (RNA) III (DNA directed) (62kD)              | RPC62     | Hs.250745 | 1q21.1       | 0.0089 | 0.1880 |
| prion protein interacting protein                       | PRNPIP    | Hs.151032 | 1p32         | 0.0057 | 0.1869 |
| ubiquitin fusion degradation 1-like                     | UFD1L     | Hs.404525 | 22q11.21     | 0.0008 | 0.1021 |
| N-ethylmaleimide-sensitive factor attachment protein,   | NAPA      | Hs.75932  | 19q13.32     | 0.0006 | 0.0597 |
| MCM7 minichromosome maintenance deficient 7 (S. d       | MCM7      | Hs.438720 | 7q21.3-q22.1 | 0.0078 | 0.0297 |
| CUG triplet repeat, RNA binding protein 1               | CUGBP1    | Hs.321390 | 11p11        | 0.0012 | 0.2712 |
| ring finger protein (C3HC4 type) 8                      | RNF8      | Hs.24439  | 6p21.3       | 0.0075 | 0.1217 |
| KIAA0296 gene product                                   | KIAA0296  | Hs.458489 | 16p11.2      | 0.0022 | 0.2822 |
| cAMP responsive element binding protein-like 1          | CREBL1    | Hs.42853  |              | 0.0058 | 0.0831 |
| H2A histone family, member V                            | H2AV      | Hs.301005 | 7p13         | 0.0072 | 0.0009 |
| spleen tyrosine kinase                                  | SYK       | Hs.192182 | 9q22         | 0.0000 | 0.0526 |
| eukaryotic translation initiation factor 4A, isoform 1  | EIF4A1    | Hs.129673 | 17p13        | 0.0028 | 0.1147 |
| Transcribed sequence with strong similarity to protein  | EST       | Hs.478508 |              | 0.0011 | 0.9941 |
| prostaglandin-endoperoxide synthase 1 (prostaglandin    | PTGS1     | Hs.88474  | 9q32-q33.3   | 0.0057 | 0.0506 |
| hypothetical protein LOC153561                          | LOC153561 | Hs.512407 | 5q13.2       | 0.0001 | 0.0993 |
| mitogen-activated protein kinase kinase kinase 7 intera | MAP3K7IP1 | Hs.403927 | 22q13.1      | 0.0057 | 0.0016 |
| tubulin, alpha, ubiquitous                              | K-ALPHA-1 | Hs.446608 | 12q13.12     | 0.0059 | 0.0000 |
| phosphatidylserine receptor                             | PTDSR     | Hs.72660  | 17q25        | 0.0059 | 0.3632 |
| chemokine (C-X-C motif) ligand 1 (melanoma growth       | CXCL1     | Hs.789    | 4q21         | 0.0000 | 0.7466 |
| proteasome (prosome, macropain) 26S subunit, non-A      | PSMD2     | Hs.388921 | 3q27.1       | 0.0001 | 0.5194 |
| barrier to autointegration factor 1                     | BANF1     | Hs.433759 | 11q13.1      | 0.0096 | 0.0859 |
| nicastrin                                               | NCSTN     | Hs.4788   | 1q22-q23     | 0.0090 | 0.0799 |
| RNA binding motif protein 6                             | RBM6      | Hs.188879 | 3p21.3       | 0.0038 | 0.3632 |
| CAP, adenylate cyclase-associated protein, 2 (yeast)    | CAP2      | Hs.296341 | 6p22.3       | 0.0038 | 0.2790 |
| prepronociceptin                                        | PNOC      | Hs.371809 | 8p21         | 0.0008 | 0.0619 |
| docking protein 1, 62kDa (downstream of tyrosine kin    | DOK1      | Hs.103854 | 2p13         | 0.0077 | 0.4240 |
| Clone CB1A11 immunoglobulin heavy chain variable        | EST       | Hs.448830 |              | 0.0017 | 0.0923 |
| major histocompatibility complex, class II, DR beta 3   | HLA-DRB3  | Hs.308026 |              | 0.0032 | 0.0363 |
| manic fringe homolog (Drosophila)                       | MFNG      | Hs.371768 | 22q12        | 0.0064 | 0.1492 |
| dishevelled, dsh homolog 3 (Drosophila)                 | DVL3      | Hs.381928 | 3q27         | 0.0007 | 0.3319 |
| major histocompatibility complex, class II, DP alpha 1  | HLA-DPA1  | Hs.914    | 6p21.3       | 0.0012 | 0.0169 |
| major histocompatibility complex, class II, DP beta 1   | HLA-DPB1  | Hs.368409 | 6p21.3       | 0.0009 | 0.0144 |
| CD72 antigen                                            | CD72      | Hs.116481 | 9p13.3       | 0.0016 | 0.6825 |
| zinc finger and BTB domain containing 5                 | ZBTB5     | Hs.3682   | 9p13.2       | 0.0015 | 0.0526 |
| KIAA0746 protein                                        | KIAA0746  | Hs.49500  | 4p15.2       | 0.0063 | 0.4355 |
| SWI/SNF related, matrix associated, actin dependent r   | SMARCD3   | Hs.444445 | 7q35-q36     | 0.0025 | 0.0562 |
| nitrogen fixation cluster-like                          | NIFU      | Hs.350702 | 12q24.1      | 0.0036 | 0.0105 |
| solute carrier family 25 (mitochondrial carrier; phosph | SLC25A3   | Hs.290404 | 12q23        | 0.0000 | 0.0084 |
| sorting nexin 17                                        | SNX17     | Hs.278569 | 2p23-p22     | 0.0042 | 0.0090 |
| guanine nucleotide binding protein (G protein), beta po | GNB3      | Hs.3759   | 12p13        | 0.0088 | 0.0078 |
| Transcribed sequence with moderate similarity to prote  | EST       | Hs.447471 |              | 0.0023 | 0.0145 |
| CD79B antigen (immunoglobulin-associated beta)          | CD79B     | Hs.89575  | 17q23        | 0.0081 | 0.0512 |
| dynactin 3 (p22)                                        | DCTN3     | Hs.511768 | 9p13         | 0.0006 | 0.1301 |
| amyotrophic lateral sclerosis 2 (juvenile) chromosome   | ALS2CR3   | Hs.154248 | 2q33         | 0.0078 | 0.0449 |
| baculoviral IAP repeat-containing 2                     | BIRC2     | Hs.289107 | 11q22        | 0.0093 | 0.2858 |
| solute carrier family 10 (sodium/bile acid cotransporte | SLC10A1   | Hs.952    | 14q24.1      | 0.0019 | 0.0977 |
| betaine-homocysteine methyltransferase                  | BHMT      | Hs.80756  | 5q13.1-q15   | 0.0004 | 0.0195 |
| Transcribed sequences                                   | EST       | Hs.271280 |              | 0.0020 | 0.1242 |
| hypothetical protein FLJ33641                           | FLJ33641  | Hs.44930  | 5q11.2       | 0.0055 | 0.0018 |
| visinin-like 1                                          | VSNL1     | Hs.2288   | 2p24.3       | 0.0099 | 0.4459 |
| actin related protein 2/3 complex, subunit 3, 21kDa     | ARPC3     | Hs.439511 | 12q24.11     | 0.0007 | 0.1536 |
| inhibitor of DNA binding 2, dominant negative helix-l   | ID2       | Hs.180919 | 2p25         | 0.0001 | 0.0160 |
| tankyrase 1 binding protein 1, 182kDa                   | TNKS1BP1  | Hs.9645   | 11q12.1      | 0.0011 | 0.3632 |
| pyridoxine-5'-phosphate oxidase                         | PNPO      | Hs.327335 | 17q21.32     | 0.0007 | 0.0763 |
| solute carrier family 6 (neurotransmitter transporter,  | SLC6A1    | Hs.22003  | 3p25-p24     | 0.0085 | 0.1950 |
| protein kinase, AMP-activated, gamma 1 non-catalytic    | PRKAG1    | Hs.3136   | 12q12-q14    | 0.0010 | 0.9741 |

|                                                         |           |           |                |        |        |
|---------------------------------------------------------|-----------|-----------|----------------|--------|--------|
| syndecan 3 (N-syndecan)                                 | SDC3      | Hs.158287 | 1pter-p22.3    | 0.0055 | 0.1496 |
| Rho guanine nucleotide exchange factor (GEF) 5          | ARHGEF5   | Hs.334    | 7q33-q35       | 0.0080 | 0.9139 |
| estrogen-related receptor gamma                         | ESRRG     | Hs.151017 | 1q41           | 0.0016 | 0.3632 |
| KIAA0635                                                | KIAA0635  | Hs.185091 | 4q12           | 0.0020 | 0.2419 |
| hypothetical protein FLJ10597                           | FLJ10597  | Hs.90375  | 1p34.1         | 0.0078 | 0.3632 |
| CDNA FLJ12815 fis, clone NT2RP2002546                   | EST       | Hs.27621  |                | 0.0029 | 0.0002 |
| iduronidase, alpha-L-                                   | IDUA      | Hs.89560  | 4p16.3         | 0.0017 | 0.0929 |
| cathepsin W (lymphopain)                                | CTSW      | Hs.416848 | 11q13.1        | 0.0000 | 0.0520 |
| hypothetical protein LOC283578                          | LOC283578 | Hs.212992 | 14q24.3        | 0.0080 | 0.0989 |
| HLA-B associated transcript 1                           | BAT1      | Hs.254042 | 6p21.3         | 0.0096 | 0.7549 |
| cytochrome P450, family 2, subfamily A, polypeptide     | CYP2A13   | Hs.181973 | 19q13.2        | 0.0007 | 0.0209 |
| PTPRF interacting protein, binding protein 1 (liprin be | PPFIBP1   | Hs.389023 | 12p11.23-p11.2 | 0.0001 | 0.1088 |
| insulin-like growth factor binding protein 7            | IGFBP7    | Hs.435795 | 4q12           | 0.0044 | 0.4481 |
| ankyrin repeat domain 15                                | ANKRD15   | Hs.77546  | 9p24.3         | 0.0025 | 0.2285 |
| ribonuclease, RNase A family, 4                         | RNASE4    | Hs.283749 |                | 0.0033 | 0.1162 |
| pericentrin 1                                           | PCNT1     | Hs.184352 | 17q25.1        | 0.0059 | 0.3632 |
| chromosome 6 open reading frame 133                     | C6orf133  | Hs.131842 | 6p21.1         | 0.0090 | 0.3632 |
| ret finger protein                                      | RFP       | Hs.440382 | 6p22           | 0.0055 | 0.3632 |
| YY1 transcription factor                                | YY1       | Hs.388927 | 14q            | 0.0008 | 0.1766 |
| mitochondrial ribosomal protein L9                      | MRPL9     | Hs.288936 |                | 0.0007 | 0.3632 |
| calcium channel, voltage-dependent, gamma subunit 2     | CACNG2    | Hs.268545 | 22q13.1        | 0.0010 | 0.3632 |
| cullin 4B                                               | CUL4B     | Hs.155976 | Xq23           | 0.0022 | 0.9485 |
| acid cluster protein 33                                 | ACP33     | Hs.242458 | 15q21-q22      | 0.0042 | 0.7496 |
| non-metastatic cells 2, protein (NM23B) expressed in    | NME2      | Hs.433416 | 17q21.3        | 0.0097 | 0.1031 |
| putative membrane protein                               | LOC54499  | Hs.93832  | 1q22-q25       | 0.0014 | 0.0569 |
| platelet-activating factor acetylhydrolase, isoform Ib, | PAFAH1B1  | Hs.77318  | 17p13.3        | 0.0001 | 1.0000 |
| FAST kinase                                             | FASTK     | Hs.75087  | 7q35           | 0.0041 | 0.2716 |
| myo-inositol 1-phosphate synthase A1                    | ISYNA1    | Hs.405873 | 19p13.11       | 0.0004 | 0.0778 |
| chromosome 1 open reading frame 19                      | C1orf19   | Hs.440663 | 1q25           | 0.0070 | 1.0000 |
| phosphoribosylaminoimidazole carboxylase, phosphori     | PAICS     | Hs.444439 | 4pter-q21      | 0.0063 | 1.0000 |
| acidic (leucine-rich) nuclear phosphoprotein 32 family  | ANP32B    | Hs.459987 | 9q22.32        | 0.0015 | 0.1318 |
| single-stranded DNA binding protein 1                   | SSBP1     | Hs.923    | 7q34           | 0.0076 | 0.4752 |
| phospholipase A2, group IIA (platelets, synovial fluid) | PLA2G2A   | Hs.76422  | 1p35           | 0.0001 | 0.1002 |
| metastasis-associated gene family, member 2             | MTA2      | Hs.173043 | 11q12-q13.1    | 0.0026 | 0.3632 |
| F-box and leucine-rich repeat protein 5                 | FBXL5     | Hs.5548   | 4p15.33        | 0.0014 | 0.1689 |
| adenosine deaminase, RNA-specific                       | ADAR      | Hs.7957   | 1q21.1-q21.2   | 0.0019 | 0.0463 |
| ATP synthase, H+ transporting, mitochondrial F0 com     | ATP5G2    | Hs.89399  | 12q13.13       | 0.0006 | 0.0587 |
| hypothetical protein MGC3047                            | MGC3047   | Hs.76239  | 1p36.33        | 0.0012 | 0.6875 |
| ATPase, H+ transporting, lysosomal accessory protein    | ATP6AP2   | Hs.183434 | Xq21           | 0.0043 | 0.4121 |
| CDNA FLJ11381 fis, clone HEMBA1000501                   | EST       | Hs.127797 |                | 0.0004 | 0.0168 |
| cytochrome P450, family 3, subfamily A, polypeptide     | CYP3A7    | Hs.308638 | 7q21-q22.1     | 0.0013 | 0.3138 |
| hypothetical protein FLJ22625                           | FLJ22625  | Hs.106534 | 5q31.1         | 0.0066 | 0.2090 |
| kaptin (actin binding protein)                          | KPTN      | Hs.25441  | 19q13.32       | 0.0014 | 0.1973 |
| geranylgeranyl diphosphate synthase 1                   | GGPS1     | Hs.55498  | 1q43           | 0.0031 | 0.9557 |
| CDNA FLJ37123 fis, clone BRACE2022450                   | EST       | Hs.337266 |                | 0.0014 | 0.3632 |
| syndecan 2 (heparan sulfate proteoglycan 1, cell surfac | SDC2      | Hs.1501   | 8q22-q23       | 0.0019 | 0.0667 |
| bifunctional phosphopantetheine adenylyl transferase/d  | DPCK      | Hs.296422 | 17q12-q21      | 0.0016 | 0.5192 |
| AD24 protein                                            | AD24      | Hs.74899  | 10q23.33       | 0.0008 | 0.3632 |
| histone deacetylase 6                                   | HDAC6     | Hs.6764   | Xp11.23        | 0.0033 | 0.3632 |
| melanoma antigen, family A, 10                          | MAGEA10   | Hs.18048  | Xq28           | 0.0073 | 1.0000 |
| methylmalonyl Coenzyme A mutase                         | MUT       | Hs.155212 | 6p21           | 0.0000 | 0.0356 |
| kallikrein B, plasma (Fletcher factor) 1                | KLKB1     | Hs.1901   | 4q34-q35       | 0.0001 | 0.0484 |
| MAWD binding protein                                    | MAWBP     | Hs.16341  | 10pter-q25.3   | 0.0004 | 0.0342 |
| COMM domain containing 10                               | COMMD10   | Hs.151458 | 5q23.1         | 0.0006 | 0.0649 |
| complement component 1, s subcomponent                  | C1S       | Hs.458355 | 12p13          | 0.0098 | 0.0012 |
| Transcribed sequences                                   | EST       | Hs.35125  |                | 0.0083 | 0.0935 |
| fucosyltransferase 1 (galactoside 2-alpha-L-fucosyltran | FUT1      | Hs.69747  | 19q13.3        | 0.0076 | 0.4551 |
| actin related protein 2/3 complex, subunit 5, 16kDa     | ARPC5     | Hs.126222 | 1q25.3         | 0.0002 | 0.4577 |
| TBC1 domain family, member 15                           | TBC1D15   | Hs.310422 | 12q21.1        | 0.0002 | 0.0485 |
| Transcribed sequences                                   | EST       | Hs.164221 |                | 0.0028 | 0.9374 |
| mitogen-activated protein kinase 10                     | MAPK10    | Hs.25209  | 4q22.1-q23     | 0.0003 | 0.0039 |

|                                                         |              |           |                |        |        |
|---------------------------------------------------------|--------------|-----------|----------------|--------|--------|
| fibrinogen, B beta polypeptide                          | FGB          | Hs.300774 | 4q28           | 0.0082 | 0.0366 |
| calcium/calmodulin-dependent protein kinase II          | CaMKIINalpha | Hs.197922 | 1p36.12        | 0.0039 | 0.0042 |
| Data not found                                          | EST          | Hs.133262 |                | 0.0000 | 0.0342 |
| flavin containing monooxygenase 3                       | FMO3         | Hs.80876  | 1q23-q25       | 0.0020 | 0.3632 |
| calcium/calmodulin-dependent protein kinase (CaM ki     | CAMK2G       | Hs.12436  | 10q22          | 0.0058 | 0.1560 |
| myosin, light polypeptide 4, alkali; atrial, embryonic  | MYL4         | Hs.356717 | 17q21-qter     | 0.0094 | 0.3632 |
| hypothetical protein PRO1580                            | PRO1580      | Hs.270863 | 5q31.3         | 0.0079 | 1.0000 |
| Transcribed sequence with strong similarity to protein  | EST          | Hs.527260 |                | 0.0075 | 0.0683 |
| G protein-coupled receptor 86                           | GPR86        | Hs.13040  | 3q24           | 0.0085 | 0.2186 |
| paraspeckle component 1                                 | PSPC1        | Hs.16364  | 13q12.11       | 0.0039 | 0.0443 |
| Transcribed sequence with strong similarity to protein  | EST          | Hs.320018 |                | 0.0002 | 0.1417 |
| hypothetical protein BC009073                           | LOC90050     | Hs.112654 | 14q32.13       | 0.0000 | 0.3632 |
| Similar to 40S ribosomal protein SA (P40) (34/67 kDa    | EST          | Hs.448968 | 19p12          | 0.0001 | 0.0015 |
| fetal Alzheimer antigen                                 | FALZ         | Hs.440947 | 17q24.3        | 0.0074 | 0.0018 |
| alpha-2-HS-glycoprotein                                 | AHSG         | Hs.324746 | 3q27           | 0.0047 | 0.0068 |
| hypothetical protein FLJ31842                           | FLJ31842     | Hs.84522  | 1p21.3         | 0.0022 | 0.0005 |
| DnaJ (Hsp40) homolog, subfamily C, member 3             | DNAJC3       | Hs.6019   |                | 0.0027 | 0.0617 |
| tRNA isopentenyltransferase 1                           | TRIT1        | Hs.356554 | 1p35.3-p34.1   | 0.0004 | 0.0281 |
| Wilms tumor 1                                           | WT1          | Hs.1145   | 11p13          | 0.0008 | 0.0824 |
| zinc finger protein 226                                 | ZNF226       | Hs.145956 | 19q13.2        | 0.0057 | 0.1521 |
| transcriptional regulating factor 1                     | TRERF1       | Hs.50102  |                | 0.0007 | 0.0117 |
| family with sequence similarity 3, member C             | FAM3C        | Hs.434053 | 7q22.1-q31.1   | 0.0000 | 0.3632 |
| histidine-rich glycoprotein                             | HRG          | Hs.1498   | 3q27           | 0.0015 | 0.2984 |
| arginine vasopressin receptor 1A                        | AVPR1A       | Hs.2131   | 12q14-q15      | 0.0005 | 0.0493 |
| serine protease inhibitor, Kazal type, 5                | SPINK5       | Hs.331555 | 5q32           | 0.0003 | 0.6628 |
| major histocompatibility complex, class II, DQ beta 1   | HLA-DQB1     | Hs.409934 | 6p21.3         | 0.0043 | 0.4644 |
| aortic preferentially expressed protein 1               | APEG1        | Hs.21639  | 2q35           | 0.0009 | 0.0204 |
| Hypothetical gene supported by BC052560 (LOC3877        | EST          | Hs.448680 |                | 0.0000 | 0.0199 |
| translocase of outer mitochondrial membrane 7 homolo    | TOMM7        | Hs.112318 | 7p15.3         | 0.0000 | 0.2009 |
| tumor necrosis factor (ligand) superfamily, member 10   | TNFSF10      | Hs.387871 | 3q26           | 0.0021 | 0.7828 |
| SA hypertension-associated homolog (rat)                | SAH          | Hs.512678 | 16p13.11       | 0.0009 | 0.1708 |
| Partial mRNA for IgM immunoglobulin heavy chain v       | EST          | Hs.448936 |                | 0.0008 | 0.0455 |
| Similar to Amine oxidase [flavin-containing] A (Mono    | EST          | Hs.522842 |                | 0.0053 | 0.0242 |
| ADP-ribosylation factor 3                               | ARF3         | Hs.119177 | 12q13          | 0.0002 | 0.7353 |
| CCAAT/enhancer binding protein (C/EBP), alpha           | CEBPA        | Hs.76171  | 19q13.1        | 0.0018 | 0.1197 |
| collapsin response mediator protein 1                   | CRMP1        | Hs.155392 | 4p16.1-p15     | 0.0066 | 0.1777 |
| chitinase 3-like 2                                      | CHI3L2       | Hs.154138 | 1p13.3         | 0.0039 | 0.3632 |
| START domain containing 3                               | STARD3       | Hs.77628  | 17q11-q12      | 0.0048 | 1.0000 |
| nudE nuclear distribution gene E homolog like 1 (A. n   | NDEL1        | Hs.3850   | 17p13.1        | 0.0062 | 1.0000 |
| baculoviral IAP repeat-containing 1                     | BIRC1        | Hs.79019  | 5q13.1         | 0.0046 | 0.2043 |
| lecithin-cholesterol acyltransferase                    | LCAT         | Hs.387239 | 16q22.1        | 0.0000 | 0.1450 |
| ATPase, H+ transporting, lysosomal 13kDa, V1 subun      | ATP6V1G2     | Hs.249227 | 6p21.3         | 0.0011 | 1.0000 |
| ATP-binding cassette, sub-family D (ALD), member 1      | ABCD1        | Hs.159546 | Xq28           | 0.0004 | 1.0000 |
| serine (or cysteine) proteinase inhibitor, clade G (C1  | SERPING1     | Hs.384598 | 11q12-q13.1    | 0.0070 | 0.0093 |
| Clone IMAGE:4249217, mRNA                               | EST          | Hs.296141 |                | 0.0001 | 0.1756 |
| clusterin (complement lysis inhibitor, SP-40,40, sulfat | CLU          | Hs.436657 | 8p21-p12       | 0.0045 | 0.0705 |
| chemokine (C-C motif) ligand 13                         | CCL13        | Hs.414629 | 17q11.2        | 0.0005 | 0.0383 |
| hypothetical protein LOC118987                          | LOC118987    | Hs.131834 | 10q26.11       | 0.0085 | 0.3632 |
| pim-1 oncogene                                          | PIM1         | Hs.81170  | 6p21.2         | 0.0082 | 0.1977 |
| UDP glycosyltransferase 1 family, polypeptide A10       | UGT1A10      | Hs.278896 |                | 0.0004 | 0.0003 |
| protein disulfide isomerase related protein (calcium-bi | ERP70        | Hs.93659  | 7q35           | 0.0024 | 0.0256 |
| jagged 1 (Alagille syndrome)                            | JAG1         | Hs.409202 | 20p12.1-p11.23 | 0.0094 | 0.0321 |
| phosphoribosyl pyrophosphate synthetase-associated p    | PRPSAP2      | Hs.13339  | 17p11.2-p12    | 0.0018 | 0.3632 |
| APEX nuclease (multifunctional DNA repair enzyme)       | APEX1        | Hs.73722  | 14q11.2-q12    | 0.0058 | 0.3632 |
| 4-hydroxyphenylpyruvate dioxygenase                     | HPD          | Hs.2899   | 12q24-qter     | 0.0029 | 0.0001 |
| Human transglutaminase mRNA, 3' untranslated region     | EST          | Hs.458353 |                | 0.0002 | 0.3632 |
| proteoglycan 1, secretory granule                       | PRG1         | Hs.1908   | 10q22.1        | 0.0036 | 0.1388 |
| phosphoserine aminotransferase 1                        | PSAT1        | Hs.286049 | 9q21.2         | 0.0059 | 0.1830 |
| glutamate dehydrogenase 2                               | GLUD2        | Hs.525862 | Xq24-q25       | 0.0034 | 0.0424 |
| E4F transcription factor 1                              | E4F1         | Hs.154196 | 16p13.3        | 0.0001 | 1.0000 |
| TAR (HIV) RNA binding protein 2                         | TARBP2       | Hs.326    | 12q12-q13      | 0.0037 | 0.3632 |

|                                                         |          |           |                |        |        |
|---------------------------------------------------------|----------|-----------|----------------|--------|--------|
| ADP-ribosylation factor 4                               | ARF4     | Hs.435639 | 3p21.2-p21.1   | 0.0004 | 0.0063 |
| threonyl-tRNA synthetase                                | TARS     | Hs.84131  | 5p13.2         | 0.0053 | 0.0422 |
| golgi-specific brefeldin A resistance factor 1          | GBF1     | Hs.155499 | 10q24          | 0.0035 | 0.0180 |
| calnexin                                                | CANX     | Hs.155560 | 5q35           | 0.0001 | 0.0042 |
| MCM3 minichromosome maintenance deficient 3 (S. dMCM3   | MCM3     | Hs.179565 | 6p12           | 0.0000 | 0.3632 |
| General transcription factor II, i, pseudogene 1, mRNA  | EST      | Hs.169921 |                | 0.0062 | 0.1726 |
| zinc ribbon domain containing, 1                        | ZNRD1    | Hs.57813  | 6p21.3         | 0.0082 | 1.0000 |
| chromosome 10 open reading frame 45                     | C10orf45 | Hs.103378 | 10p13          | 0.0000 | 0.0791 |
| solute carrier family 9 (sodium/hydrogen exchanger), i  | SLC9A3R1 | Hs.396783 | 17q25.1        | 0.0067 | 0.0067 |
| KIAA0063 gene product                                   | KIAA0063 | Hs.3094   | 22q13.1        | 0.0075 | 0.1856 |
| Jumonji, AT rich interactive domain 1C (RBP2-like)      | JARID1C  | Hs.103381 | Xp11.22-p11.21 | 0.0020 | 0.0500 |
| abl interactor 2                                        | ABI2     | Hs.387906 | 2q33           | 0.0001 | 0.0233 |
| Phosphoserine phosphatase-like mRNA, complete cds       | EST      | Hs.490626 |                | 0.0005 | 0.3977 |
| catenin (cadherin-associated protein), alpha-like 1     | CTNNAL1  | Hs.58488  | 9q31.2         | 0.0044 | 0.0058 |
| plasminogen                                             | PLG      | Hs.143436 | 6q26           | 0.0009 | 0.7675 |
| adenosine A2b receptor                                  | ADORA2B  | Hs.45743  | 17p12-p11.2    | 0.0056 | 1.0000 |
| EphA7                                                   | EPHA7    | Hs.73962  | 6q16.1         | 0.0039 | 0.2595 |
| microtubule-associated protein 2                        | MAP2     | Hs.167    | 2q34-q35       | 0.0013 | 0.3632 |
| NADH dehydrogenase (ubiquinone) flavoprotein 1, 51      | NDUFV1   | Hs.7744   | 11q13          | 0.0071 | 0.2273 |
| zinc finger protein 398                                 | ZNF398   | Hs.169452 | 7q36.1         | 0.0000 | 0.4642 |
| dCMP deaminase                                          | DCTD     | Hs.76894  | 4q35.1         | 0.0097 | 0.3632 |
| tumor rejection antigen (gp96) 1                        | TRA1     | Hs.192374 | 12q24.2-q24.3  | 0.0023 | 0.0018 |
| membrane component, chromosome 11, surface marker       | M11S1    | Hs.278672 | 11p13          | 0.0006 | 0.0779 |
| thymidylate synthetase                                  | TYMS     | Hs.87491  | 18p11.32       | 0.0078 | 0.2728 |
| transcription elongation factor A (SII), 1              | TCEA1    | Hs.78869  | 8q11.2         | 0.0037 | 0.0494 |
| dolichyl-diphosphooligosaccharide-protein glycosyltra   | DDOST    | Hs.301882 | 1p36.1         | 0.0004 | 0.3632 |
| MUF1 protein                                            | MUF1     | Hs.144941 | 1p34.1         | 0.0001 | 1.0000 |
| cell division cycle 2, G1 to S and G2 to M              | CDC2     | Hs.334562 | 10q21.1        | 0.0029 | 0.0058 |
| integrin beta 1 binding protein 1                       | ITGB1BP1 | Hs.200666 | 2p25.2         | 0.0004 | 1.0000 |
| galactosidase, alpha                                    | GLA      | Hs.69089  | Xq22           | 0.0021 | 1.0000 |
| glucosidase, beta; acid (includes glucosylceramidase)   | GBA      | Hs.282997 | 1q21           | 0.0065 | 0.3632 |
| RIO kinase 3 (yeast)                                    | RIOK3    | Hs.209061 | 18q11.2        | 0.0083 | 0.4910 |
| uroporphyrinogen decarboxylase                          | UROD     | Hs.78601  | 1p34           | 0.0005 | 0.3632 |
| leukocyte receptor cluster (LRC) member 4               | LENG4    | Hs.78768  | 19q13.4        | 0.0066 | 0.3632 |
| retinitis pigmentosa GTPase regulator                   | RPGR     | Hs.378949 | Xp11.4         | 0.0013 | 1.0000 |
| protein tyrosine phosphatase, receptor type, F          | PTPRF    | Hs.75216  | 1p34           | 0.0015 | 1.0000 |
| clathrin, heavy polypeptide (Hc)                        | CLTC     | Hs.187416 | 17q11-qter     | 0.0063 | 0.3632 |
| interleukin enhancer binding factor 2, 45kDa            | ILF2     | Hs.75117  | 1q21.3         | 0.0000 | 0.0516 |
| activating transcription factor 4 (tax-responsive enhan | ATF4     | Hs.181243 | 22q13.1        | 0.0004 | 0.8299 |
| glutaminyl-tRNA synthetase                              | QARS     | Hs.79322  | 3p21.3-p21.1   | 0.0025 | 0.1187 |
| exportin 1 (CRM1 homolog, yeast)                        | XPO1     | Hs.157367 | 2p16           | 0.0006 | 0.0483 |
| nucleolin                                               | NCL      | Hs.79110  | 2q12-qter      | 0.0062 | 0.8787 |
| similar to RIKEN cDNA A430101B06 gene                   | MGC13017 | Hs.293659 | 5q31.1         | 0.0003 | 0.4293 |
| thyroid autoantigen 70kDa (Ku antigen)                  | G22P1    | Hs.169744 | 22q13.2-q13.31 | 0.0032 | 0.3632 |
| hypothetical protein MGC11061                           | MGC11061 | Hs.66309  | 2p22.3         | 0.0007 | 0.2957 |
| Data not found                                          | EST      | Hs.308680 |                | 0.0005 | 0.3500 |
| histone deacetylase 1                                   | HDAC1    | Hs.88556  | 1p34           | 0.0029 | 0.9745 |
| uracil-DNA glycosylase                                  | UNG      | Hs.78853  | 12q23-q24.1    | 0.0005 | 1.0000 |
| glyceraldehyde-3-phosphate dehydrogenase                | GAPD     | Hs.169476 |                | 0.0078 | 0.0863 |
| cytochrome c oxidase subunit VIII                       | COX8     | Hs.433901 | 11q12-q13      | 0.0019 | 0.0337 |
| Similar to eukaryotic translation initiation factor 3,  | EST      | Hs.433280 | 2p16.1         | 0.0015 | 0.1735 |
| proteasome (prosome, macropain) subunit, beta type,     | 7PSMB7   | Hs.197071 | 9q34.11-q34.12 | 0.0031 | 0.0571 |
| Similar to BLOCK 23 (LOC220717), mRNA                   | EST      | Hs.448226 |                | 0.0027 | 0.4189 |
| lamin A/C                                               | LMNA     | Hs.436441 | 1q21.2-q21.3   | 0.0002 | 0.0962 |
| KIAA0652 gene product                                   | KIAA0652 | Hs.410092 | 11p11.2        | 0.0007 | 0.4246 |
| ATP synthase, H+ transporting, mitochondrial F1 com     | ATP5C1   | Hs.155433 | 10p15.1        | 0.0015 | 0.3893 |
| claudin 5 (transmembrane protein deleted in velocardio  | CLDN5    | Hs.110903 | 22q11.21       | 0.0003 | 0.0113 |
| COX15 homolog, cytochrome c oxidase assembly prot       | COX15    | Hs.226581 | 10q24          | 0.0001 | 0.0020 |
| insulin-like growth factor 2 (somatomedin A)            | IGF2     | Hs.349109 |                | 0.0033 | 0.1898 |
| mesoderm specific transcript homolog (mouse)            | MEST     | Hs.440459 | 7q32           | 0.0033 | 0.0065 |
| eukaryotic translation initiation factor 3, subunit 8,  | EIF3S8   | Hs.388163 | 16p11.2        | 0.0038 | 0.7234 |



|                                                         |          |           |                |        |        |
|---------------------------------------------------------|----------|-----------|----------------|--------|--------|
| RNA binding motif protein 10                            | RBM10    | Hs.348276 | Xp11.23        | 0.0001 | 0.4395 |
| interferon gamma receptor 2 (interferon gamma trans     | IFNGR2   | Hs.409200 | 21q22.11       | 0.0002 | 0.0291 |
| immediate early response 2                              | IER2     | Hs.737    | 19p13.13       | 0.0022 | 0.0478 |
| AD-003 protein                                          | AD-003   | Hs.284250 | 9q34.11        | 0.0074 | 0.4189 |
| ribosomal protein L27                                   | RPL27    | Hs.405528 | 17q21.1-q21.2  | 0.0015 | 0.0209 |
| thymidylate synthetase                                  | TYMS     | Hs.87491  | 18p11.32       | 0.0009 | 0.0712 |
| succinate dehydrogenase complex, subunit A, flavopro    | SDHA     | Hs.440475 | 5p15           | 0.0030 | 0.9241 |
| protein phosphatase 4 (formerly X), catalytic subunit   | PPP4C    | Hs.2903   | 16p12-16p11    | 0.0097 | 0.0317 |
| U5 snRNP-specific protein, 200-KD                       | U5-200KD | Hs.246112 | 2q11.2         | 0.0056 | 0.0842 |
| polymerase (DNA directed), epsilon 3 (p17 subunit)      | POLE3    | Hs.108112 | 9q33           | 0.0011 | 0.1426 |
| protective protein for beta-galactosidase (galactosiali | PPGB     | Hs.118126 | 20q13.1        | 0.0016 | 0.0887 |
| phospholipase D3                                        | PLD3     | Hs.257008 | 19q13.2        | 0.0018 | 0.3746 |
| chromosome 7 open reading frame 24                      | C7orf24  | Hs.444840 | 7p15-p14       | 0.0022 | 0.2163 |
| hypothetical protein FLJ20519                           | FLJ20519 | Hs.435461 | 1q21.2         | 0.0047 | 0.0378 |
| hypothetical protein FLJ20254                           | FLJ20254 | Hs.15356  | 2p23.3         | 0.0065 | 0.3304 |
| dehydrogenase E1 and transketolase domain containing    | DHTKD1   | Hs.501565 | 10p14          | 0.0004 | 0.9509 |
| adenylosuccinate lyase                                  | ADSL     | Hs.75527  | 22q13.1        | 0.0006 | 0.2402 |
| chromosome 21 open reading frame 56                     | C21orf56 | Hs.381214 | 21q22.3        | 0.0000 | 0.1999 |
| dihydrofolate reductase                                 | DHFR     | Hs.464813 |                | 0.0004 | 0.4851 |
| mitochondrial ribosomal protein L51                     | MRPL51   | Hs.55847  | 12p13.3-p13.1  | 0.0057 | 0.0482 |
| hypothetical protein MGC2603                            | MGC2603  | Hs.149305 | 1p36.11        | 0.0033 | 0.3895 |
| retinoblastoma binding protein 4                        | RBBP4    | Hs.16003  | 1p35.1         | 0.0005 | 0.1187 |
| hypothetical protein FLJ10597                           | FLJ10597 | Hs.90375  | 1p34.1         | 0.0054 | 0.2942 |
| ADP-ribosylation factor-like 2 binding protein          | ARL2BP   | Hs.9552   | 16q13          | 0.0004 | 0.6694 |
| small nuclear ribonucleoprotein polypeptide G           | SNRPG    | Hs.436656 |                | 0.0067 | 0.0011 |
| hydroxysteroid (17-beta) dehydrogenase 4                | HSD17B4  | Hs.356894 | 5q21           | 0.0014 | 0.8628 |
| H2A histone family, member V                            | H2AV     | Hs.301005 | 7p13           | 0.0030 | 0.0227 |
| insulin-like growth factor binding protein 3            | IGFBP3   | Hs.450230 | 7p13-p12       | 0.0058 | 0.0132 |
| proteasome (prosome, macropain) 26S subunit, non-A      | PSMD13   | Hs.279554 | 11p15.5        | 0.0067 | 0.3632 |
| A kinase (PRKA) anchor protein 1                        | AKAP1    | Hs.78921  | 17q21-q23      | 0.0004 | 0.7900 |
| hairy/enhancer-of-split related with YRPW motif 1       | HEY1     | Hs.234434 | 8q21           | 0.0028 | 0.2770 |
| bifunctional apoptosis regulator                        | BFAR     | Hs.435556 | 16p13.12       | 0.0007 | 0.7663 |
| uroporphyrinogen decarboxylase                          | UROD     | Hs.78601  | 1p34           | 0.0028 | 0.4628 |
| protein phosphatase methylesterase-1                    | PME-1    | Hs.63304  | 11q13.4        | 0.0065 | 0.0208 |
| NADH dehydrogenase (ubiquinone) 1 alpha subcomp         | NDUFA7   | Hs.19561  | 19p13.2        | 0.0009 | 0.0012 |
| Rab geranylgeranyltransferase, alpha subunit            | RABGGTA  | Hs.377992 | 14q11.2        | 0.0029 | 0.6974 |
| MCM3 minichromosome maintenance deficient 3 (S. c       | MCM3     | Hs.179565 | 6p12           | 0.0097 | 0.0079 |
| UDP-glucose pyrophosphorylase 2                         | UGP2     | Hs.417361 | 2p14-p13       | 0.0015 | 0.0185 |
| ribophorin II                                           | RPN2     | Hs.406532 | 20q12-q13.1    | 0.0001 | 0.0107 |
| inhibitor of DNA binding 3, dominant negative helix-I   | ID3      | Hs.76884  | 1p36.13-p36.12 | 0.0029 | 0.2039 |
| chromosome 7 open reading frame 20                      | C7orf20  | Hs.107387 | 7p22.3         | 0.0068 | 0.2108 |
| proliferation-associated 2G4, 38kDa                     | PA2G4    | Hs.374491 | 12q13          | 0.0024 | 0.2208 |
| FK506 binding protein 1A, 12kDa                         | FKBP1A   | Hs.374638 |                | 0.0045 | 0.1836 |
| NICE-4 protein                                          | NICE-4   | Hs.8127   | 1q21.3         | 0.0001 | 0.0561 |
| ribosomal protein S3                                    | RPS3     | Hs.387576 | 11q13.3-q13.5  | 0.0001 | 0.0430 |
| KIAA1536 protein                                        | KIAA1536 | Hs.156667 | 12q13.13       | 0.0050 | 0.1444 |
| likely ortholog of mouse membrane bound C2 domain       | MBC2     | Hs.8309   | 12q13.2        | 0.0037 | 0.0585 |
| tubulin beta MGC4083                                    | MGC4083  | Hs.274398 | 18p11.21       | 0.0010 | 0.0151 |
| v-erb-b2 erythroblastic leukemia viral oncogene homo    | ERBB3    | Hs.306251 | 12q13          | 0.0008 | 0.2690 |
| prolactin regulatory element binding                    | PREB     | Hs.279784 | 2p23.3         | 0.0086 | 0.4540 |
| hypothetical protein similar to RNA-binding protein la  | MGC10871 | Hs.49994  | 11q13          | 0.0072 | 0.2370 |
| Gardner-Rasheed feline sarcoma viral (v-fgr) oncogene   | FGR      | Hs.1422   | 1p36.2-p36.1   | 0.0054 | 0.8368 |
| tubulin alpha 6                                         | TUBA6    | Hs.406578 | 12q12-q14      | 0.0008 | 0.0112 |
| nudix (nucleoside diphosphate linked moiety X)-type     | NUDT2    | Hs.429142 | 9p13           | 0.0001 | 1.0000 |
| ribosomal protein S16                                   | RPS16    | Hs.397609 | 19q13.1        | 0.0060 | 0.0080 |
| SRY (sex determining region Y)-box 7                    | SOX7     | Hs.213194 |                | 0.0000 | 0.1445 |
| nucleostemin                                            | NS       | Hs.313544 | 3p21.1         | 0.0018 | 0.0665 |
| Similar to tubulin, beta 5 (LOC92755), mRNA             | EST      | Hs.458472 | 8p12           | 0.0001 | 0.1179 |
| proteasome (prosome, macropain) 26S subunit, ATPas      | PSMC3    | Hs.250758 | 11p12-p13      | 0.0000 | 0.1149 |
| nucleolin                                               | NCL      | Hs.79110  | 2q12-qter      | 0.0047 | 0.0378 |
| exonuclease 1                                           | EXO1     | Hs.47504  | 1q42-q43       | 0.0000 | 0.0394 |

|                                                       |           |           |               |        |        |
|-------------------------------------------------------|-----------|-----------|---------------|--------|--------|
| KIAA0121 gene product                                 | KIAA0121  | Hs.155584 | 3p25.3        | 0.0040 | 0.1961 |
| MEP50 protein                                         | MEP50     | Hs.446551 | 1p13.2        | 0.0023 | 0.3632 |
| TAR (HIV) RNA binding protein 2                       | TARBP2    | Hs.326    | 12q12-q13     | 0.0022 | 0.8380 |
| cyclin-dependent kinase 4                             | CDK4      | Hs.95577  | 12q14         | 0.0019 | 0.3632 |
| hypothetical protein FLJ10579                         | FLJ10579  | Hs.8055   | 15q15.1       | 0.0014 | 0.4907 |
| zinc finger protein 551                               | ZNF551    | Hs.184846 | 19q13.43      | 0.0009 | 0.2465 |
| POM121 membrane glycoprotein (rat)                    | POM121    | Hs.380964 |               | 0.0005 | 0.0053 |
| GABA(A) receptor-associated protein like 1            | GABARAPL1 | Hs.336429 | 12p13.2       | 0.0003 | 0.4311 |
| follicular lymphoma variant translocation 1           | FVT1      | Hs.74050  | 18q21.3       | 0.0000 | 0.2044 |
| NPD007 protein                                        | NPD007    | Hs.7788   | 7q11.23       | 0.0066 | 0.3060 |
| carboxypeptidase Z                                    | CPZ       | Hs.78068  | 4p16.1        | 0.0019 | 0.0302 |
| myogenin (myogenic factor 4)                          | MYOG      | Hs.2830   | 1q31-q41      | 0.0006 | 0.3632 |
| CDNA clone MGC:13162 IMAGE:3010103, complete          | EST       | Hs.99081  |               | 0.0015 | 0.0002 |
| NCK adaptor protein 1                                 | NCK1      | Hs.54589  | 3q21          | 0.0015 | 0.0313 |
| glutamate dehydrogenase 2                             | GLUD2     | Hs.525862 | Xq24-q25      | 0.0040 | 0.3204 |
| mesenchymal stem cell protein DSC92                   | NEUGRIN   | Hs.124452 | 15q26.1       | 0.0002 | 0.2706 |
| hypothetical protein MGC14425                         | MGC14425  | Hs.122655 |               | 0.0025 | 0.3632 |
| phospholipase C, gamma 2 (phosphatidylinositol-speci  | PLCG2     | Hs.512298 | 16q24.1       | 0.0001 | 0.1253 |
| hypothetical protein MGC45731                         | MGC45731  | Hs.381105 | 1p12          | 0.0049 | 0.0978 |
| hypothetical protein LOC339903                        | LOC339903 | Hs.146346 | 3p22.1        | 0.0066 | 0.0165 |
| hypothetical protein FLJ13852                         | FLJ13852  | Hs.165186 | 8q24.3        | 0.0000 | 0.2818 |
| F-box only protein 7                                  | FBXO7     | Hs.5912   | 22q12-q13     | 0.0034 | 0.4692 |
| Clone IMAGE:5169682, mRNA                             | EST       | Hs.334714 |               | 0.0095 | 0.3632 |
| chromosome 9 open reading frame 83                    | C9orf83   | Hs.415534 | 9p13.3        | 0.0029 | 0.0037 |
| metallothionein 2A                                    | MT2A      | Hs.418241 | 16q13         | 0.0000 | 0.0293 |
| thiopurine S-methyltransferase                        | TPMT      | Hs.377402 | 6p22.3        | 0.0021 | 0.0001 |
| lipoyltransferase 1                                   | LIPT1     | Hs.112356 | 2q11.2        | 0.0010 | 0.0000 |
| serum amyloid A4, constitutive                        | SAA4      | Hs.512677 | 11p15.1-p14   | 0.0045 | 0.0284 |
| fatty acid binding protein 3, muscle and heart (mamma | FABP3     | Hs.112669 | 1p33-p32      | 0.0019 | 0.0020 |
| PTD016 protein                                        | LOC51136  | Hs.30154  | 17q23.2       | 0.0042 | 0.1059 |
| hemopexin                                             | HPX       | Hs.426485 | 11p15.5-p15.4 | 0.0011 | 0.0087 |
| titin immunoglobulin domain protein (myotilin)        | TTID      | Hs.84665  | 5q31          | 0.0017 | 0.1735 |
| dihydropyrimidine dehydrogenase                       | DPYD      | Hs.1602   | 1p22          | 0.0080 | 0.0337 |
| Data not found                                        | EST       |           |               | 0.0018 | 0.0084 |
| tryptophan 2,3-dioxygenase                            | TDO2      | Hs.183671 | 4q31-q32      | 0.0003 | 0.0007 |
| carboxypeptidase B2 (plasma, carboxypeptidase U)      | CPB2      | Hs.221926 | 13q14.11      | 0.0047 | 0.0070 |
| fibrinogen-like 1                                     | FGL1      | Hs.107    | 8p22-p21.3    | 0.0009 | 0.0254 |
| geminin, DNA replication inhibitor                    | GMNN      | Hs.234896 | 6p22.2        | 0.0062 | 0.3632 |
| Data not found                                        | EST       | Hs.334568 |               | 0.0094 | 0.0115 |
| sterol carrier protein 2                              | SCP2      | Hs.75760  | 1p32          | 0.0029 | 0.0310 |
| histamine N-methyltransferase                         | HNMT      | Hs.42151  | 2q22.1        | 0.0072 | 0.1779 |
| villin 2 (ezrin)                                      | VIL2      | Hs.403997 | 6q25.2-q26    | 0.0024 | 0.0000 |
| tubulin, alpha 1 (testis specific)                    | TUBA1     | Hs.75318  |               | 0.0064 | 0.1103 |
| Huntingtin interacting protein K                      | HYPK      | Hs.511978 | 15q15.3       | 0.0075 | 0.2917 |
| myo-inositol 1-phosphate synthase A1                  | ISYNA1    | Hs.405873 | 19p13.11      | 0.0054 | 0.1328 |
| CAP, adenylate cyclase-associated protein 1 (yeast)   | CAP1      | Hs.104125 | 1p34.2        | 0.0091 | 0.1369 |
| tubulin, alpha, ubiquitous                            | K-ALPHA-1 | Hs.446608 | 12q13.12      | 0.0039 | 0.0041 |
| malate dehydrogenase 1, NAD (soluble)                 | MDH1      | Hs.75375  | 2p13.3        | 0.0001 | 0.0560 |
| retinoblastoma-associated factor 600                  | RBAF600   | Hs.287616 | 1p36.13       | 0.0055 | 0.5754 |
| integrin beta 4 binding protein                       | ITGB4BP   | Hs.5215   | 20q12         | 0.0039 | 0.0338 |
| melanocortin 1 receptor (alpha melanocyte stimulating | MC1R      | Hs.435105 | 16q24.3       | 0.0007 | 0.0531 |
| Data not found                                        | EST       | Hs.239307 |               | 0.0054 | 0.1315 |
| tubulin, beta, 5                                      | TUBB5     | Hs.110837 | 19p13.3       | 0.0000 | 0.0174 |
| tubulin, beta, 2                                      | TUBB2     | Hs.433615 |               | 0.0005 | 0.0229 |
| mitochondrial intermediate peptidase                  | MIPEP     | Hs.68583  | 13q12         | 0.0087 | 0.3632 |
| dolichyl-diphosphooligosaccharide-protein glycosyltra | DDOST     | Hs.301882 | 1p36.1        | 0.0065 | 0.3057 |
| PAGE-5 protein                                        | PAGE-5    | Hs.245431 | Xp11.22       | 0.0087 | 0.0874 |
| spermidine/spermine N1-acetyltransferase 2            | SAT2      | Hs.10846  | 17p13.1       | 0.0035 | 0.9386 |
| hypothetical protein FLJ20345                         | FLJ20345  | Hs.408843 | 17q23.2       | 0.0004 | 0.3632 |
| hydroxyprostaglandin dehydrogenase 15-(NAD)           | HPGD      | Hs.77348  | 4q34-q35      | 0.0009 | 0.2653 |
| small inducible cytokine subfamily E, member 1 (endo  | SCYE1     | Hs.105656 | 4q24          | 0.0062 | 0.1868 |

|                                                         |          |           |             |        |        |
|---------------------------------------------------------|----------|-----------|-------------|--------|--------|
| testis-specific protein TSP-NY                          | TSP-NY   | Hs.97643  | 12q24.31    | 0.0013 | 0.6533 |
| polymerase (RNA) III (DNA directed) polypeptide K,      | POLR3K   | Hs.437186 | 16p13.3     | 0.0060 | 0.3129 |
| cerebroside (3'-phosphoadenylylsulfate:galactosylceran  | CST      | Hs.17958  | 22q12.2     | 0.0058 | 0.3770 |
| major histocompatibility complex, class II, DQ beta 1   | HLA-DQB1 | Hs.409934 | 6p21.3      | 0.0002 | 0.0835 |
| hypothetical protein MGC20255                           | MGC20255 | Hs.437497 | 19q13.2     | 0.0014 | 0.4195 |
| small nuclear RNA activating complex, polypeptide 1,    | SNAPC1   | Hs.179312 | 14q22       | 0.0069 | 0.2722 |
| tyrosine kinase 2                                       | TYK2     | Hs.75516  | 19p13.2     | 0.0028 | 0.2138 |
| chromosome 8 open reading frame 4                       | C8orf4   | Hs.283683 | 8p11.2      | 0.0054 | 0.0746 |
| arginase, liver                                         | ARG1     | Hs.440934 | 6q23        | 0.0002 | 0.0185 |
| RNA polymerase III subunit RPC8                         | RPC8     | Hs.202505 | 22q13.2     | 0.0026 | 0.0620 |
| asialoglycoprotein receptor 2                           | ASGR2    | Hs.1259   | 17p         | 0.0029 | 0.0253 |
| Transcribed sequence with moderate similarity to prote  | EST      | Hs.447471 |             | 0.0066 | 0.0268 |
| G-protein signalling modulator 1 (AGS3-like, C. elega   | GPSM1    | Hs.239370 | 9q34.3      | 0.0023 | 0.0132 |
| zinc finger protein 481                                 | ZNF481   | Hs.5638   | 9q33.2      | 0.0079 | 0.5210 |
| mutS homolog 2, colon cancer, nonpolyposis type 1 (EM   | SH2      | Hs.440394 | 2p22-p21    | 0.0054 | 0.0230 |
| hypothetical protein HSPC138                            | HSPC138  | Hs.283322 | 11q14.2     | 0.0035 | 0.3417 |
| pleiomorphic adenoma gene-like 2                        | PLAGL2   | Hs.154104 | 20q11.21    | 0.0017 | 0.6277 |
| troponin I, skeletal, fast                              | TNNI2    | Hs.83760  | 11p15.5     | 0.0000 | 1.0000 |
| malic enzyme 1, NADP(+)-dependent, cytosolic            | ME1      | Hs.14732  | 6q12        | 0.0032 | 0.0601 |
| regulator of G-protein signalling 5                     | RGS5     | Hs.24950  | 1q23.1      | 0.0074 | 0.0220 |
| 4-hydroxyphenylpyruvate dioxygenase                     | HPD      | Hs.2899   | 12q24-qter  | 0.0000 | 0.0055 |
| dual-specificity tyrosine-(Y)-phosphorylation regulat   | DYRK1B   | Hs.130988 | 19q12-13.1  | 0.0021 | 1.0000 |
| phosphoenolpyruvate carboxykinase 1 (soluble)           | PCK1     | Hs.1872   | 20q13.31    | 0.0022 | 0.0678 |
| popeye domain containing 3                              | POPDC3   | Hs.458336 | 6q21        | 0.0043 | 0.3003 |
| tubulin, beta, 2                                        | TUBB2    | Hs.433615 |             | 0.0027 | 0.2332 |
| histatin 1                                              | HTN1     | Hs.250959 | 4q13        | 0.0003 | 0.5349 |
| zinc finger protein (C2H2 type) 277                     | ZNF277   | Hs.42636  | 7q31.1      | 0.0006 | 0.5699 |
| chromosome 6 open reading frame 165                     | C6orf165 | Hs.82921  | 6q15        | 0.0005 | 0.3632 |
| ficolin (collagen/fibrinogen domain containing) 3 (Hak  | FCN3     | Hs.333383 | 1p36.11     | 0.0048 | 0.1417 |
| intelectin 1 (galactofuranose binding)                  | ITLN1    | Hs.50813  |             | 0.0042 | 1.0000 |
| Data not found                                          | EST      | Hs.2388   |             | 0.0004 | 0.1472 |
| transthyretin (prealbumin, amyloidosis type I)          | TTR      | Hs.427202 | 18q12.1     | 0.0008 | 0.0251 |
| sulfotransferase family, cytosolic, 2A, dehydroepiandro | SULT2A1  | Hs.81884  | 19q13.3     | 0.0062 | 0.2980 |
| complement component 9                                  | C9       | Hs.1290   | 5p14-p12    | 0.0003 | 0.0000 |
| fibrinogen, A alpha polypeptide                         | FGA      | Hs.351593 | 4q28        | 0.0014 | 0.0135 |
| methylmalonyl CoA epimerase                             | MCEE     | Hs.94949  | 2p13.3      | 0.0020 | 0.0058 |
| ficolin (collagen/fibrinogen domain containing) 1       | FCN1     | Hs.440898 | 9q34        | 0.0000 | 0.3632 |
| cytochrome P450, family 2, subfamily C, polypeptide     | CYP2C8   | Hs.282871 | 10q23.33    | 0.0055 | 0.0294 |
| pre-B-cell colony enhancing factor 1                    | PBEF1    | Hs.293464 | 7q22.3      | 0.0013 | 0.0469 |
| metallothionein 1G                                      | MT1G     | Hs.433391 | 16q13       | 0.0000 | 0.0112 |
| Opa-interacting protein 2                               | OIP2     | Hs.274170 | 13q13.1     | 0.0037 | 0.3150 |
| metallothionein 1F (functional)                         | MT1F     | Hs.438737 | 16q13       | 0.0000 | 0.0001 |
| hypothetical protein FLJ23235                           | FLJ23235 | Hs.211501 | 4p14        | 0.0000 | 0.0075 |
| hypothetical protein MGC27345                           | MGC27345 | Hs.511404 | 7q32.2      | 0.0001 | 0.0090 |
| zinc finger protein 519                                 | ZNF519   | Hs.352635 | 18p11.21    | 0.0000 | 0.0007 |
| solute carrier family 38, member 2                      | SLC38A2  | Hs.298275 | 12q         | 0.0010 | 0.0031 |
| metallothionein 1A (functional)                         | MT1A     | Hs.440939 | 16q13       | 0.0000 | 0.0001 |
| deoxyribonuclease I                                     | DNASE1   | Hs.436928 | 16p13.3     | 0.0013 | 0.1212 |
| ATPase, H+ transporting, lysosomal 56/58kDa, V1 sub     | ATP6V1B1 | Hs.64173  | 2p13.1      | 0.0008 | 0.1816 |
| RNA (guanine-9-) methyltransferase domain containin     | RG9MTD1  | Hs.57898  | 3q12.3      | 0.0023 | 0.0845 |
| Transcribed sequence with strong similarity to protein  | EST      | Hs.480552 |             | 0.0094 | 0.0175 |
| solute carrier family 22 (organic cation transporter),  | SLC22A13 | Hs.225941 | 3p21.3      | 0.0007 | 0.0102 |
| cyclin-dependent kinase 4                               | CDK4     | Hs.95577  | 12q14       | 0.0068 | 0.3961 |
| ribophorin II                                           | RPN2     | Hs.406532 | 20q12-q13.1 | 0.0014 | 0.1719 |
| tubulin beta MGC4083                                    | MGC4083  | Hs.274398 | 18p11.21    | 0.0001 | 0.3798 |
| CDNA clone IMAGE:3628701, partial cds                   | EST      | Hs.98028  |             | 0.0001 | 0.9644 |
| Similar to tubulin, beta 5 (LOC92755), mRNA             | EST      | Hs.458472 | 8p12        | 0.0001 | 0.0903 |
| very low density lipoprotein receptor                   | VLDLR    | Hs.370422 | 9p24        | 0.0070 | 0.3632 |
| Data not found                                          | EST      | Hs.166697 |             | 0.0076 | 0.2314 |
| homeo box A4                                            | HOXA4    | Hs.147747 | 7p15-p14    | 0.0006 | 0.3675 |
| CDC20 cell division cycle 20 homolog (S. cerevisiae)    | CDC20    | Hs.82906  | 1p34.1      | 0.0032 | 0.3632 |

|                                                               |             |           |               |           |        |
|---------------------------------------------------------------|-------------|-----------|---------------|-----------|--------|
| CDC20 cell division cycle 20 homolog ( <i>S. cerevisiae</i> ) | CDC20       | Hs.82906  | 1p34.1        | 0.0015    | 0.3632 |
| hypothetical protein LOC51244                                 | LOC51244    | Hs.236257 | 3p25.1        | 0.0060    | 0.0009 |
| chemokine (C-X-C motif) ligand 2                              | CXCL2       | Hs.75765  | 4q21          | 0.0062    | 0.0009 |
| solute carrier family 35, member A4                           | SLC35A4     | Hs.173103 | 5q31.3        | 0.0052    | 0.3303 |
| Transcribed sequence with moderate similarity to protein      | EST         | Hs.483430 |               | 0.0091    | 0.0281 |
| Transcribed sequence with strong similarity to protein        | EST         | Hs.450326 |               | 0.0015    | 0.0660 |
| ribosomal protein L12                                         | RPL12       | Hs.408054 |               | 0.0002    | 0.1443 |
| CDNA FLJ42958 fis, clone BRSTN2010750                         | EST         | Hs.41688  |               | 0.0012    | 0.2763 |
| PIN2-interacting protein 1                                    | PINX1       | Hs.400259 | 8p23          | 0.0016    | 0.0033 |
| Clone IMAGE:3616855, mRNA                                     | EST         | Hs.225083 |               | 0.0064    | 0.0101 |
| guanine nucleotide binding protein-like 1                     | GNL1        | Hs.83147  | 6p21.3        | 0.0036    | 0.6147 |
| PP1201 protein                                                | PP1201      | Hs.434007 | 2p24.3-p24.1  | 0.0040    | 0.1675 |
| hypothetical protein FLJ13852                                 | FLJ13852    | Hs.165186 | 8q24.3        | 0.0083    | 0.1955 |
| hypothetical protein LOC157567                                | LOC157567   | Hs.11506  |               | 0.0055    | 0.1231 |
| KIAA1102 protein                                              | KIAA1102    | Hs.156761 | 4p13          | 0.0006    | 0.1291 |
| bone morphogenetic protein 1                                  | BMP1        | Hs.1274   | 8p21          | 0.0013    | 0.4172 |
| Transcribed sequence with strong similarity to protein        | EST         | Hs.478508 |               | 0.0092    | 0.2662 |
| Transcribed sequence with strong similarity to protein        | EST         | Hs.460344 |               | 0.0000    | 0.1092 |
| chromosome 6 open reading frame 83                            | C6orf83     | Hs.284265 | 6q27          | 0.0008    | 0.1429 |
| ubiquitin-protein isopeptide ligase (E3)                      | KIAA0010    | Hs.155287 | 7q36.3        | 0.0034    | 0.0169 |
| LOC89231                                                      | LOC89231    | Hs.487918 |               | 0.0005    | 0.2493 |
| arginyl aminopeptidase (aminopeptidase B)                     | RNPEP       | Hs.283667 | 1q32          | 0.0007    | 0.0363 |
| interleukin 1 receptor, type II                               | IL1R2       | Hs.25333  | 2q12-q22      | 0.0025    | 0.4657 |
| dihydroorotate dehydrogenase                                  | DHODH       | Hs.405639 | 16q22         | 0.0021    | 0.2008 |
| zinc finger and BTB domain containing 1                       | ZBTB1       | Hs.511938 | 14q23.3       | 0.0051    | 0.1225 |
| RNA polymerase I associated factor 53                         | PAF53       | Hs.24884  | 9p13.2        | 0.0001    | 0.5640 |
| CDNA FLJ27497 fis, clone TST05436                             | EST         | Hs.205439 |               | 0.0011    | 0.0142 |
| LOC400602 (LOC400602), mRNA                                   | EST         | Hs.408434 |               | 0.0014    | 0.0028 |
| cytochrome P450, family 19, subfamily A, polypeptide          | CYP19A1     | Hs.187471 | 15q21.1       | 0.0075    | 0.0389 |
| golgi reassembly stacking protein 2, 55kDa                    | GORASP2     | Hs.6880   | 2q31.1-q31.2  | 0.0096    | 0.0049 |
| mitochondrial tumor suppressor gene 1                         | MTSG1       | Hs.7946   | 8p22          | 0.0003    | 0.0373 |
| tyrosine aminotransferase                                     | TAT         | Hs.161640 | 16q22.1       | 0.0017    | 0.2321 |
| coagulation factor XI (plasma thromboplastin antecedent)      | F11         | Hs.1430   | 4q35          | 0.0027    | 0.4032 |
| mannosidase, alpha, class 1A, member 2                        | MAN1A2      | Hs.367638 | 1p13          | 0.0046    | 0.0230 |
| hypothetical protein DKFZp762C1112                            | DKFZp762C11 | Hs.88594  | 8q21.3        | 0.0022    | 0.1442 |
| Transcribed sequence with weak similarity to protein r        | EST         | Hs.3731   |               | 0.0061    | 0.1544 |
| chromosome 10 open reading frame 76                           | C10orf76    | Hs.9444   | 10q24.32      | 0.0049    | 0.0257 |
| ATP synthase mitochondrial F1 complex assembly fac            | ATPAF2      | Hs.13434  | 17p11.2       | 0.0035    | 0.3632 |
| cell division cycle 25C                                       | CDC25C      | Hs.656    | 5q31          | 0.0000    | 0.0212 |
| aldolase A, fructose-bisphosphate                             | ALDOA       | Hs.273415 | 16q22-q24     | 0.0058    | 0.5172 |
| novel 58.3 KDA protein                                        | LOC91614    | Hs.180545 | 11p13         | 0.0000    | 0.6823 |
| ceruloplasmin (ferroxidase)                                   | CP          | Hs.282557 | 3q23-q25      | 0.0001    | 0.0300 |
| Clone IMAGE:4671447, mRNA                                     | EST         | Hs.382687 |               | 0.0001    | 0.1032 |
| Transcribed sequence with moderate similarity to prote        | EST         | Hs.447471 |               | 0.0062    | 0.0061 |
| KIAA0692 protein                                              | KIAA0692    | Hs.524874 | 12q24.33      | 0.0037    | 0.0581 |
| peptidase (mitochondrial processing) alpha                    | PMPCA       | Hs.75353  | 9q34.3        | 0.0100    | 0.6792 |
| ribosomal protein S3                                          | RPS3        | Hs.387576 | 11q13.3-q13.5 | 0.0001    | 0.0244 |
| Transcribed sequence with moderate similarity to prote        | EST         | Hs.461408 |               | 0.0013    | 0.8382 |
| Clone IMAGE:5015646, mRNA                                     | EST         | Hs.385483 |               | 0.0001    | 0.1282 |
| endoglycan                                                    | PODLX2      | Hs.145416 |               | 15 0.0012 | 0.8763 |
| C-terminal binding protein 1                                  | CTBP1       | Hs.196083 | 4p16          | 0.0001    | 0.0731 |
| antigen p97 (melanoma associated) identified by mono          | MFI2        | Hs.252855 | 3q28-q29      | 0.0085    | 0.4161 |
| methyltransferase like 3                                      | METTL3      | Hs.168799 | 14q11.1       | 0.0044    | 0.3632 |
| IKK interacting protein                                       | IKIP        | Hs.406199 | 12q23.1       | 0.0008    | 0.0880 |
| Clone BAC 33J7 diphosphoinositol polyphosphate pho            | EST         | Hs.356699 |               | 0.0049    | 0.2281 |
| sema domain, immunoglobulin domain (Ig), transm               | SEMA4G      | Hs.444359 | 10q24.32      | 0.0018    | 0.3632 |
| Similar to tubulin, beta 5 (LOC92755), mRNA                   | EST         | Hs.458472 | 8p12          | 0.0003    | 0.0260 |
| Clone IMAGE:6646977, mRNA                                     | EST         | Hs.162880 |               | 0.0000    | 0.9022 |
| Transcribed sequence with moderate similarity to prote        | EST         | Hs.461412 |               | 0.0001    | 0.1556 |
| zinc finger protein 584                                       | ZNF584      | Hs.439551 | 19q13.43      | 0.0058    | 0.1521 |
| exportin 1 (CRM1 homolog, yeast)                              | XPO1        | Hs.157367 | 2p16          | 0.0001    | 0.3566 |

|                                                         |             |           |               |        |        |
|---------------------------------------------------------|-------------|-----------|---------------|--------|--------|
| hypothetical protein FLJ10851                           | FLJ10851    | Hs.17860  | 10q11.23      | 0.0001 | 1.0000 |
| glyceraldehyde-3-phosphate dehydrogenase, spermatog     | GAPDS       | Hs.248017 | 19q13.1       | 0.0062 | 1.0000 |
| nardilysin (N-arginine dibasic convertase)              | NRD1        | Hs.4099   | 1p32.2-p32.1  | 0.0009 | 0.5334 |
| glyceraldehyde-3-phosphate dehydrogenase                | GAPD        | Hs.169476 |               | 0.0056 | 0.1446 |
| Hypothetical protein LOC339894 (LOC339894), mRNA        | NEST        | Hs.398203 |               | 0.0006 | 0.0333 |
| CDNA FLJ41467 fis, clone BRSTN2017995                   | EST         | Hs.147878 |               | 0.0027 | 0.1882 |
| kelch-like 11 (Drosophila)                              | KLHL11      | Hs.13268  | 17q21.2       | 0.0024 | 0.0233 |
| actin related protein 2/3 complex, subunit 3, 21kDa     | ARPC3       | Hs.439511 | 12q24.11      | 0.0060 | 0.4203 |
| 5,10-methenyltetrahydrofolate synthetase (5-formyltetra | MTHFS       | Hs.118131 | 15q25.1       | 0.0030 | 0.3632 |
| Clone IMAGE:4826263, mRNA                               | EST         | Hs.250839 |               | 0.0000 | 0.6285 |
| zinc finger, DHHC domain containing 21                  | ZDHHC21     | Hs.21388  | 9p22.3        | 0.0003 | 0.7103 |
| Clone IMAGE:4824668, mRNA                               | EST         | Hs.385720 |               | 0.0002 | 0.3620 |
| Clone IMAGE:4823013, mRNA                               | EST         | Hs.400608 |               | 0.0046 | 0.0959 |
| leukotriene A4 hydrolase                                | LTA4H       | Hs.81118  | 12q22         | 0.0010 | 0.3632 |
| zinc finger protein 92 (HTF12)                          | ZNF92       | Hs.9521   | 7q11.21       | 0.0075 | 0.0256 |
| hypothetical protein MAC30                              | MAC30       | Hs.199695 | 17q11.2       | 0.0046 | 0.1019 |
| Similar to ribosomal protein L13a; 60S ribosomal prot   | EST         | Hs.446637 | 13q14.3       | 0.0044 | 0.3632 |
| stathmin 1/oncoprotein 18                               | STMN1       | Hs.209983 | 1p36.1-p35    | 0.0037 | 0.1880 |
| MRNA; cDNA DKFZp686C135 (from clone DKFZp6              | EST         | Hs.504592 |               | 0.0005 | 0.3632 |
| Similar to hypothetical protein LOC163227, clone IM     | EST         | Hs.428579 |               | 0.0098 | 0.4282 |
| Clone IMAGE:5294815, mRNA                               | EST         | Hs.385636 |               | 0.0000 | 0.3632 |
| hypothetical protein MGC33993                           | MGC33993    | Hs.111164 | 6p23          | 0.0094 | 0.7922 |
| Data not found                                          | EST         | Hs.511920 |               | 0.0013 | 0.7048 |
| neural cell adhesion molecule 2                         | NCAM2       | Hs.135892 | 21q21.1       | 0.0001 | 0.7976 |
| hypothetical protein MGC48625                           | MGC48625    | Hs.20506  | 19q13.42      | 0.0005 | 1.0000 |
| hypothetical protein DKFZp313M0720                      | DKFZp313M07 | Hs.410941 | 12q12         | 0.0005 | 0.5539 |
| similar to alpha tubulin                                | LOC112714   | Hs.433336 | 2q21.1        | 0.0041 | 0.1283 |
| tumor protein p53 binding protein, 1                    | TP53BP1     | Hs.440968 | 15q15-q21     | 0.0008 | 1.0000 |
| phosphatidylinositol 4-kinase, catalytic, beta polypept | PIK4CB      | Hs.154846 | 1q21          | 0.0014 | 0.3632 |
| activating transcription factor 4 (tax-responsive enhan | ATF4        | Hs.181243 | 22q13.1       | 0.0002 | 0.3669 |
| apoptosis related protein APR-3                         | 38080       | Hs.9527   | 2p23.3        | 0.0083 | 0.3632 |
| tubulin, beta polypeptide                               | TUBB        | Hs.512712 | 6p25          | 0.0069 | 0.2335 |
| tubulin, alpha 8                                        | TUBA8       | Hs.137400 | 22q11.1       | 0.0037 | 0.0430 |
| Clone IMAGE:5296353, mRNA                               | EST         | Hs.34068  |               | 0.0003 | 0.3632 |
| ADP-ribosylation factor 4                               | ARF4        | Hs.435639 | 3p21.2-p21.1  | 0.0002 | 0.2077 |
| Transcribed sequence with strong similarity to protein  | EST         | Hs.486676 |               | 0.0086 | 0.0255 |
| secretory carrier membrane protein 3                    | SCAMP3      | Hs.200600 | 1q21          | 0.0052 | 0.3505 |
| Transcribed sequence with strong similarity to protein  | EST         | Hs.447673 |               | 0.0070 | 0.3632 |
| heterogeneous nuclear ribonucleoprotein C (C1/C2)       | HNRPC       | Hs.476302 | 14q11.2       | 0.0023 | 0.3391 |
| splicing factor, arginine/serine-rich 3                 | SFRS3       | Hs.405144 | 6p21          | 0.0011 | 0.3632 |
| peptidyl prolyl isomerase H (cyclophilin H)             | PPIH        | Hs.9880   | 1p34.1        | 0.0065 | 1.0000 |
| melanoma antigen, family A, 12                          | MAGEA12     | Hs.169246 | Xq28          | 0.0002 | 0.4592 |
| sulfotransferase family, cytosolic, 1A, phenol-preferri | SULT1A1     | Hs.142    | 16p12.1       | 0.0001 | 0.5722 |
| sulfotransferase family, cytosolic, 1A, phenol-preferri | SULT1A1     | Hs.142    | 16p12.1       | 0.0005 | 0.0068 |
| transcription elongation factor A (SII)-like 1          | TCEAL1      | Hs.95243  | Xq22.1        | 0.0009 | 0.1837 |
| KIAA1068 protein                                        | KIAA1068    | Hs.4770   | 7p13-p12      | 0.0018 | 0.4491 |
| ribosomal protein S13                                   | RPS13       | Hs.446588 | 11p15         | 0.0010 | 0.0037 |
| DKFZP586A0522 protein                                   | DKFZP586A05 | Hs.288771 | 12q13.12      | 0.0028 | 0.9552 |
| mitochondrial ribosomal protein L15                     | MRPL15      | Hs.18349  | 8q11.2-q13    | 0.0018 | 0.0271 |
| epithelial cell transforming sequence 2 oncogene        | ECT2        | Hs.293257 | 3q26.1-q26.2  | 0.0070 | 0.3632 |
| PRO0659 protein                                         | PRO0659     | Hs.460663 |               | 0.0053 | 0.1197 |
| hypoxia-inducible protein 2                             | HIG2        | Hs.61762  | 7q32.2        | 0.0024 | 0.0680 |
| hypothetical protein MGC5576                            | MGC5576     | Hs.103834 | 12q13.1       | 0.0083 | 0.3664 |
| galactose-4-epimerase, UDP-                             | GALE        | Hs.76057  | 1p36-p35      | 0.0014 | 0.3632 |
| dCMP deaminase                                          | DCTD        | Hs.76894  | 4q35.1        | 0.0076 | 0.3632 |
| tubulin, alpha, ubiquitous                              | K-ALPHA-1   | Hs.446608 | 12q13.12      | 0.0048 | 0.0836 |
| SWI/SNF related, matrix associated, actin dependent r   | SMARCC2     | Hs.236030 | 12q13-q14     | 0.0003 | 0.8371 |
| zinc finger protein 22 (KOX 15)                         | ZNF22       | Hs.108642 | 10q11         | 0.0000 | 0.0710 |
| metallothionein 2A                                      | MT2A        | Hs.418241 | 16q13         | 0.0000 | 0.0015 |
| phosphorylase, glycogen; brain                          | PYGB        | Hs.145820 | 20p11.2-p11.1 | 0.0020 | 0.0106 |
| chromosome 20 open reading frame 64                     | C20orf64    | Hs.440263 | 20q13.2       | 0.0003 | 0.0035 |

|                                                         |           |           |                |        |        |
|---------------------------------------------------------|-----------|-----------|----------------|--------|--------|
| NADH dehydrogenase (ubiquinone) 1 beta subcomplex       | NDUFB1    | Hs.183435 | 14q32.12       | 0.0041 | 0.0009 |
| coiled-coil domain containing 7                         | CCDC7     | Hs.407833 |                | 0.0001 | 0.0178 |
| hypothetical protein PRO1580                            | PRO1580   | Hs.270863 | 5q31.3         | 0.0088 | 0.1869 |
| putative small membrane protein NID67                   | NID67     | Hs.29444  | 5q33.1         | 0.0056 | 0.3632 |
| ATP-binding cassette, sub-family D (ALD), member 3      | ABCD3     | Hs.76781  | 1p22-p21       | 0.0025 | 0.3801 |
| hypothetical protein FLJ20445                           | FLJ20445  | Hs.343748 | 10q23.32-q23.3 | 0.0070 | 0.0088 |
| erythroid differentiation-related factor 1              | EDRF1     | Hs.355929 | 10q26.13-q26.2 | 0.0075 | 0.3632 |
| chromosome 14 open reading frame 130                    | C14orf130 | Hs.6877   | 14q32.13       | 0.0075 | 0.0824 |
| melanoma antigen, family A, 1 (directs expression of    | MAGEA1    | Hs.72879  | Xq28           | 0.0003 | 0.2240 |
| Ig superfamily protein                                  | Z39IG     | Hs.8904   | Xq12-q13.3     | 0.0092 | 1.0000 |
| Clone IMAGE:4151631, mRNA                               | EST       | Hs.350552 |                | 0.0011 | 0.0065 |
| serine (or cysteine) proteinase inhibitor, clade G (C1  | SERPING1  | Hs.384598 | 11q12-q13.1    | 0.0001 | 0.0108 |
| K+ channel tetramerization protein                      | GMRP-1    | Hs.332382 | 11p15.2        | 0.0012 | 0.0047 |
| queuine tRNA-ribosyltransferase 1 (tRNA-guanine tra     | QTRT1     | Hs.323084 | 19p13.3        | 0.0005 | 0.0921 |
| chromosome 3 open reading frame 10                      | C3orf10   | Hs.421654 | 3p25.3         | 0.0011 | 0.9263 |
| proteoglycan 1, secretory granule                       | PRG1      | Hs.1908   | 10q22.1        | 0.0029 | 0.0573 |
| TEA domain family member 4                              | TEAD4     | Hs.94865  | 12p13.2-p13.3  | 0.0072 | 1.0000 |
| X-linked protein                                        | DJ79P11.1 | Hs.398989 | Xq22           | 0.0078 | 0.3180 |
| procollagen-lysine, 2-oxoglutarate 5-dioxygenase (lysi  | PLOD      | Hs.75093  | 1p36.3-p36.2   | 0.0064 | 0.3632 |
| taxol resistance associated gene 3                      | TRAG3     | Hs.458484 | Xq28           | 0.0015 | 0.3632 |
| melanoma antigen, family A, 2                           | MAGEA2    | Hs.36980  | Xq28           | 0.0041 | 1.0000 |
| granulin                                                | GRN       | Hs.180577 | 17q21.32       | 0.0049 | 0.3632 |
| homeo box C11                                           | HOXC11    | Hs.127562 | 12q13.3        | 0.0002 | 1.0000 |
| asp (abnormal spindle)-like, microcephaly associated    | ASPM      | Hs.121028 | 1q31           | 0.0088 | 0.5421 |
| nucleolar and spindle associated protein 1              | NUSAP1    | Hs.279905 | 15q15.1        | 0.0000 | 0.1065 |
| ubiquitin specific protease 24                          | USP24     | Hs.7243   | 1p32.3         | 0.0020 | 1.0000 |
| hypothetical protein MGC34831                           | MGC34831  | Hs.367964 | Xp21.1         | 0.0000 | 0.0628 |
| H1 histone family, member 0                             | H1F0      | Hs.226117 | 22q13.1        | 0.0001 | 0.1271 |
| serine (or cysteine) proteinase inhibitor, clade F (alp | SERPINF2  | Hs.159509 | 17p13          | 0.0009 | 0.0685 |
| ribosomal protein L27                                   | RPL27     | Hs.405528 | 17q21.1-q21.2  | 0.0001 | 0.0215 |
| TAP binding protein (tapasin)                           | TAPBP     | Hs.370937 | 6p21.3         | 0.0004 | 0.1172 |
| thyroid autoantigen 70kDa (Ku antigen)                  | G22P1     | Hs.169744 | 22q13.2-q13.31 | 0.0017 | 0.2876 |
| ribophorin I                                            | RPN1      | Hs.2280   |                | 0.0001 | 0.1158 |
| protein kinase, cAMP-dependent, regulatory, type I, al  | PRKAR1A   | Hs.280342 | 17q23-q24      | 0.0026 | 0.3037 |
| complement component 4A                                 | C4A       | Hs.150833 |                | 0.0053 | 0.2802 |
| carboxylesterase 1 (monocyte/macrophage serine ester    | CES1      | Hs.278997 | 16q13-q22.1    | 0.0035 | 0.0925 |
| Transcribed sequence with strong similarity to protein  | EST       | Hs.490146 |                | 0.0091 | 0.3360 |
| CGG triplet repeat binding protein 1                    | CGGBP1    | Hs.444818 | 3p12-p11.1     | 0.0010 | 0.5346 |
| CDNA clone IMAGE:4156718, partial cds                   | EST       | Hs.382184 |                | 0.0005 | 0.3632 |
| catalase                                                | CAT       | Hs.395771 | 11p13          | 0.0018 | 0.0655 |
| fms-related tyrosine kinase 4                           | FLT4      | Hs.415048 |                | 0.0057 | 0.1744 |
| protein tyrosine phosphatase, receptor type, A          | PTPRA     | Hs.306676 |                | 0.0033 | 0.1072 |
| Clone IMAGE:4420333, mRNA                               | EST       | Hs.382039 |                | 0.0075 | 1.0000 |
| Clone IMAGE:3923185, mRNA                               | EST       | Hs.354068 |                | 0.0069 | 0.0878 |
| guanine nucleotide binding protein (G protein), beta po | GNB2L1    | Hs.5662   | 5q35.3         | 0.0001 | 0.2035 |
| mannosyl (alpha-1,3-)-glycoprotein beta-1,4-N-acetylg   | MGAT4B    | Hs.437277 | 5q35           | 0.0082 | 1.0000 |
| major histocompatibility complex, class II, DQ beta 1   | HLA-DQB1  | Hs.409934 | 6p21.3         | 0.0010 | 1.0000 |
| hypothetical protein FLJ22595                           | FLJ22595  | Hs.287702 | 3q25.33        | 0.0014 | 0.3632 |
| Clone IMAGE:4753178, mRNA                               | EST       | Hs.382631 |                | 0.0059 | 0.4092 |
| transforming growth factor, beta receptor I (activin A  | TGFBR1    | Hs.28005  | 9q22           | 0.0055 | 0.3632 |
| Data not found                                          | EST       | Hs.0      |                | 0.0000 | 0.1204 |
| insulin-like growth factor binding protein 1            | IGFBP1    | Hs.401316 | 7p13-p12       | 0.0002 | 0.0070 |
| insulin-like growth factor binding protein 1            | IGFBP1    | Hs.401316 | 7p13-p12       | 0.0001 | 0.0214 |
| clusterin (complement lysis inhibitor, SP-40,40, sulfat | CLU       | Hs.436657 | 8p21-p12       | 0.0010 | 0.1723 |
| golgi membrane protein SB140                            | SMAP-5    | Hs.5672   | 5q31.3         | 0.0028 | 0.4577 |
| myeloid inhibitory C-type lectin-like receptor          | MICL      | Hs.190519 | 12p13.31       | 0.0083 | 0.4573 |
| sulfotransferase family, cytosolic, 1A, phenol-preferri | SULT1A2   | Hs.389536 | 16p12.1        | 0.0003 | 0.0448 |
| DNA-damage-inducible transcript 4                       | DDIT4     | Hs.111244 | 10pter-q26.12  | 0.0000 | 0.8454 |
| metallothionein 1X                                      | MT1X      | Hs.374950 | 16q13          | 0.0001 | 0.0008 |
| chromosome 14 open reading frame 28                     | C14orf28  | Hs.82098  | 14q21.2        | 0.0059 | 0.4494 |
| glucosidase, beta; acid (includes glucosylceramidase)   | GBA       | Hs.282997 | 1q21           | 0.0009 | 1.0000 |

|                                                         |             |           |              |        |        |
|---------------------------------------------------------|-------------|-----------|--------------|--------|--------|
| succinate dehydrogenase complex, subunit C, integral    | SDHC        | Hs.433982 | 1q21         | 0.0000 | 0.3632 |
| metallothionein 1K                                      | MT1K        | Hs.188518 | 16q13        | 0.0000 | 0.0079 |
| Clone IMAGE:5209417, mRNA                               | EST         | Hs.171192 |              | 0.0003 | 0.0813 |
| mitogen-activated protein kinase kinase 3               | MAP2K3      | Hs.180533 | 17q11.2      | 0.0012 | 0.0417 |
| PR domain containing 10                                 | PRDM10      | Hs.275086 | 11q25        | 0.0046 | 0.0003 |
| activin A receptor, type I                              | ACVR1       | Hs.150402 | 2q23-q24     | 0.0028 | 0.1344 |
| hypothetical protein FLJ31121                           | FLJ31121    | Hs.350194 | 5q31.3       | 0.0099 | 0.1066 |
| hypothetical protein MGC45491                           | MGC45491    | Hs.149532 | 6p21.1       | 0.0089 | 0.3632 |
| ribosomal protein L7a                                   | RPL7A       | Hs.416801 | 9q34         | 0.0001 | 0.0553 |
| leukotriene A4 hydrolase                                | LTA4H       | Hs.81118  | 12q22        | 0.0048 | 0.3632 |
| synaptotagmin binding, cytoplasmic RNA interacting p    | SYNCRIP     | Hs.436376 |              | 0.0025 | 0.2083 |
| voltage-dependent calcium channel gamma subunit-lik     | PR1         | Hs.26216  | 2q14.2       | 0.0046 | 0.9455 |
| vav 2 oncogene                                          | VAV2        | Hs.4248   | 9q34.1       | 0.0054 | 1.0000 |
| flavoprotein oxidoreductase MICAL3                      | MICAL3      | Hs.165551 | 22q11.21     | 0.0069 | 0.2218 |
| Hypothetical protein LOC284593 (LOC284593), mRNA        | NEST        | Hs.399150 |              | 0.0000 | 0.0137 |
| casein kinase 1, delta                                  | CSNK1D      | Hs.378918 | 17q25        | 0.0007 | 1.0000 |
| syndecan 2 (heparan sulfate proteoglycan 1, cell surfac | SDC2        | Hs.1501   | 8q22-q23     | 0.0009 | 0.1513 |
| myosin, heavy polypeptide 9, non-muscle                 | MYH9        | Hs.146550 | 22q13.1      | 0.0009 | 0.4945 |
| progesterin and adipoQ receptor family member X         | PAQR10      | Hs.379190 | 7p22.1       | 0.0033 | 0.1880 |
| origin recognition complex, subunit 3-like (yeast)      | ORC3L       | Hs.312419 | 6q14.3-q16.1 | 0.0094 | 1.0000 |
| timeless homolog (Drosophila)                           | TIMELESS    | Hs.118631 | 12q12-q13    | 0.0015 | 1.0000 |
| Similar to beta-tubulin 4Q (LOC286222), mRNA            | EST         | Hs.433616 |              | 0.0001 | 0.3632 |
| beta 5-tubulin                                          | OK/SW-cl.56 | Hs.356729 | 6p21.33      | 0.0001 | 0.0409 |
| Similar to tubulin, beta 5 (LOC92755), mRNA             | EST         | Hs.458472 | 8p12         | 0.0000 | 0.1587 |
| tubulin, alpha, ubiquitous                              | K-ALPHA-1   | Hs.446608 | 12q13.12     | 0.0033 | 0.0000 |
| beta 5-tubulin                                          | OK/SW-cl.56 | Hs.356729 | 6p21.33      | 0.0001 | 0.0564 |
| Transcribed sequences                                   | EST         | Hs.443097 |              | 0.0005 | 1.0000 |
| inactive progesterone receptor, 23 kD                   | TEBP        | Hs.355693 | 12q13.3      | 0.0003 | 0.0248 |
| adenosylmethionine decarboxylase 1                      | AMD1        | Hs.159118 | 6q21-q22     | 0.0014 | 0.3632 |
| importin 13                                             | IPO13       | Hs.158497 | 1p34.1       | 0.0000 | 0.3632 |
| polymerase (RNA) II (DNA directed) polypeptide A, 2     | POLR2A      | Hs.171880 | 17p13.1      | 0.0094 | 0.1249 |
| stathmin 1/oncoprotein 18                               | STMN1       | Hs.209983 | 1p36.1-p35   | 0.0090 | 0.0034 |
| Clone IMAGE:4827547, mRNA                               | EST         | Hs.436938 |              | 0.0047 | 0.3632 |

est)
